# Supplementary material for: Libra: scalable k-mer–based tool for massive all-vs-all metagenome comparisons
Source: PubMed Central journal article supplement (PMC6354030; doi:10.1093/gigascience/giy165), 2018-12-28
Supplement: giy165_giga-d-18-00324_original_submission.pdf [file giy165_giga-d-18-00324_original_submission.pdf]

# GigaScience

## Libra: robust biological inferences of global datasets using scalable k-mer based all-vs-all metagenome comparisons

--Manuscript Draft--

|                                                      |                                                                                                                                                                                                                                                                                                                                                                                                                                                                                                                                                                                                                                                                                                                                                                                                                                                                                                                                                                                                                                                                                                                                                                                                                                                                                                                                                                                                                                                                                                                                                                                                                                                                                                                                                      |                        |
|------------------------------------------------------|------------------------------------------------------------------------------------------------------------------------------------------------------------------------------------------------------------------------------------------------------------------------------------------------------------------------------------------------------------------------------------------------------------------------------------------------------------------------------------------------------------------------------------------------------------------------------------------------------------------------------------------------------------------------------------------------------------------------------------------------------------------------------------------------------------------------------------------------------------------------------------------------------------------------------------------------------------------------------------------------------------------------------------------------------------------------------------------------------------------------------------------------------------------------------------------------------------------------------------------------------------------------------------------------------------------------------------------------------------------------------------------------------------------------------------------------------------------------------------------------------------------------------------------------------------------------------------------------------------------------------------------------------------------------------------------------------------------------------------------------------|------------------------|
| <b>Manuscript Number:</b>                            | GIGA-D-18-00324                                                                                                                                                                                                                                                                                                                                                                                                                                                                                                                                                                                                                                                                                                                                                                                                                                                                                                                                                                                                                                                                                                                                                                                                                                                                                                                                                                                                                                                                                                                                                                                                                                                                                                                                      |                        |
| <b>Full Title:</b>                                   | Libra: robust biological inferences of global datasets using scalable k-mer based all-vs-all metagenome comparisons                                                                                                                                                                                                                                                                                                                                                                                                                                                                                                                                                                                                                                                                                                                                                                                                                                                                                                                                                                                                                                                                                                                                                                                                                                                                                                                                                                                                                                                                                                                                                                                                                                  |                        |
| <b>Article Type:</b>                                 | Research                                                                                                                                                                                                                                                                                                                                                                                                                                                                                                                                                                                                                                                                                                                                                                                                                                                                                                                                                                                                                                                                                                                                                                                                                                                                                                                                                                                                                                                                                                                                                                                                                                                                                                                                             |                        |
| <b>Funding Information:</b>                          | Directorate for Computer and Information Science and Engineering (1640775)                                                                                                                                                                                                                                                                                                                                                                                                                                                                                                                                                                                                                                                                                                                                                                                                                                                                                                                                                                                                                                                                                                                                                                                                                                                                                                                                                                                                                                                                                                                                                                                                                                                                           | Prof. Bonnie L Hurwitz |
| <b>Abstract:</b>                                     | <p>Background</p> <p>Shotgun metagenomics provides powerful insights into microbial community biodiversity and function. Unfortunately, inferences from metagenomic studies are often limited by dataset size and complexity, and are restricted by the availability and completeness of existing databases. De novo comparative metagenomics enables the comparison of metagenomes based on their total genetic content.</p> <p>Results</p> <p>We developed a novel tool called Libra that performs all-vs-all comparison of metagenomes based on their k-mer-composition. This tool presents three main innovations: the use of a scalable Apache Hadoop framework enabling massive dataset comparison, the use of complex distance metrics allowing precise clustering of metagenomes based on their k-mer content, and a web-based tool imbedded in iMicrobe (<a href="http://imicrobe.us">http://imicrobe.us</a>) that uses the CyVerse advanced cyberinfrastructure to promote broad use of the tool by the scientific community.</p> <p>Conclusions</p> <p>A comparison of Libra to equivalent tools using both simulated and real metagenomic datasets, ranging from 80 million to 4.2 billion reads, reveals that numerous methods commonly implemented to reduce compute time for large datasets—such as data reduction, read count normalization, and presence/absence distance metrics—greatly diminish the degree of resolution and robustness of large-scale comparative analyses. In contrast, Libra provides scalable high-resolution comparisons using all reads without biases due to differences in abundance and read depth, enabling global-scale analyses to identify microbial signatures linked to biological processes.</p> |                        |
| <b>Corresponding Author:</b>                         | Bonnie Hurwitz<br>UNITED STATES                                                                                                                                                                                                                                                                                                                                                                                                                                                                                                                                                                                                                                                                                                                                                                                                                                                                                                                                                                                                                                                                                                                                                                                                                                                                                                                                                                                                                                                                                                                                                                                                                                                                                                                      |                        |
| <b>Corresponding Author Secondary Information:</b>   |                                                                                                                                                                                                                                                                                                                                                                                                                                                                                                                                                                                                                                                                                                                                                                                                                                                                                                                                                                                                                                                                                                                                                                                                                                                                                                                                                                                                                                                                                                                                                                                                                                                                                                                                                      |                        |
| <b>Corresponding Author's Institution:</b>           |                                                                                                                                                                                                                                                                                                                                                                                                                                                                                                                                                                                                                                                                                                                                                                                                                                                                                                                                                                                                                                                                                                                                                                                                                                                                                                                                                                                                                                                                                                                                                                                                                                                                                                                                                      |                        |
| <b>Corresponding Author's Secondary Institution:</b> |                                                                                                                                                                                                                                                                                                                                                                                                                                                                                                                                                                                                                                                                                                                                                                                                                                                                                                                                                                                                                                                                                                                                                                                                                                                                                                                                                                                                                                                                                                                                                                                                                                                                                                                                                      |                        |
| <b>First Author:</b>                                 | Illyoung Choi, MS                                                                                                                                                                                                                                                                                                                                                                                                                                                                                                                                                                                                                                                                                                                                                                                                                                                                                                                                                                                                                                                                                                                                                                                                                                                                                                                                                                                                                                                                                                                                                                                                                                                                                                                                    |                        |
| <b>First Author Secondary Information:</b>           |                                                                                                                                                                                                                                                                                                                                                                                                                                                                                                                                                                                                                                                                                                                                                                                                                                                                                                                                                                                                                                                                                                                                                                                                                                                                                                                                                                                                                                                                                                                                                                                                                                                                                                                                                      |                        |
| <b>Order of Authors:</b>                             | Illyoung Choi, MS<br>Alise J. Ponsero, PhD<br>Matthew Bomhoff, MS<br>Ken Youens-Clark, BA                                                                                                                                                                                                                                                                                                                                                                                                                                                                                                                                                                                                                                                                                                                                                                                                                                                                                                                                                                                                                                                                                                                                                                                                                                                                                                                                                                                                                                                                                                                                                                                                                                                            |                        |

|                                                                                                                                                                                                                                                                                                                                                                                                                                                                                                                                     |                       |
|-------------------------------------------------------------------------------------------------------------------------------------------------------------------------------------------------------------------------------------------------------------------------------------------------------------------------------------------------------------------------------------------------------------------------------------------------------------------------------------------------------------------------------------|-----------------------|
|                                                                                                                                                                                                                                                                                                                                                                                                                                                                                                                                     | John H. Hartman, PhD  |
|                                                                                                                                                                                                                                                                                                                                                                                                                                                                                                                                     | Bonnie L Hurwitz, PhD |
| <b>Order of Authors Secondary Information:</b>                                                                                                                                                                                                                                                                                                                                                                                                                                                                                      |                       |
| <b>Additional Information:</b>                                                                                                                                                                                                                                                                                                                                                                                                                                                                                                      |                       |
| <b>Question</b>                                                                                                                                                                                                                                                                                                                                                                                                                                                                                                                     | <b>Response</b>       |
| Are you submitting this manuscript to a special series or article collection?                                                                                                                                                                                                                                                                                                                                                                                                                                                       | No                    |
| <p><b>Experimental design and statistics</b></p> <p>Full details of the experimental design and statistical methods used should be given in the Methods section, as detailed in our <a href="#">Minimum Standards Reporting Checklist</a>. Information essential to interpreting the data presented should be made available in the figure legends.</p> <p>Have you included all the information requested in your manuscript?</p>                                                                                                  | Yes                   |
| <p><b>Resources</b></p> <p>A description of all resources used, including antibodies, cell lines, animals and software tools, with enough information to allow them to be uniquely identified, should be included in the Methods section. Authors are strongly encouraged to cite <a href="#">Research Resource Identifiers</a> (RRIDs) for antibodies, model organisms and tools, where possible.</p> <p>Have you included the information requested as detailed in our <a href="#">Minimum Standards Reporting Checklist</a>?</p> | Yes                   |
| <p><b>Availability of data and materials</b></p> <p>All datasets and code on which the conclusions of the paper rely must be either included in your submission or deposited in <a href="#">publicly available repositories</a> (where available and ethically appropriate), referencing such data using</p>                                                                                                                                                                                                                        | Yes                   |

a unique identifier in the references and in the “Availability of Data and Materials” section of your manuscript.

Have you have met the above requirement as detailed in our [Minimum Standards Reporting Checklist](#)?

1  
2  
3  
4  
5  
6  
7  
8  
9  
10  
11  
12  
13  
14  
15  
16  
17  
18  
19  
20  
21  
22  
23  
24  
25  
26  
27  
28  
29  
30  
31  
32  
33  
34  
35  
36  
37  
38  
39  
40  
41  
42  
43  
44  
45  
46  
47  
48  
49  
50  
51  
52  
53  
54  
55  
56  
57  
58  
59  
60  
61  
62  
63  
64  
65

1 **Title:** Libra: robust biological inferences of global datasets using scalable k-mer based all-vs-all  
2 metagenome comparisons

3  
4 **Authors:** Illyoung Choi<sup>1</sup>, Alise J. Ponsero<sup>2</sup>, Matthew Bomhoff<sup>2</sup>, Ken Youens-Clark<sup>2</sup>, John H.  
5 Hartman<sup>1\*</sup>, and Bonnie L. Hurwitz<sup>2,3\*</sup>

6  
7 **Affiliations:**

8 <sup>1</sup>Department of Computer Science, University of Arizona, Tucson, Arizona

9 <sup>2</sup>Department of Biosystems Engineering, University of Arizona, Tucson, Arizona

10 <sup>3</sup>BIO5 Institute, University of Arizona, Tucson, Arizona

11 **Corresponding Author:**

12 Bonnie L. Hurwitz [bhurwitz@email.arizona.edu](mailto:bhurwitz@email.arizona.edu)

1  
2  
3  
4  
5  
6  
7  
8  
9  
10  
11  
12  
13  
14  
15  
16  
17  
18  
19  
20  
21  
22  
23  
24  
25  
26  
27  
28  
29  
30  
31  
32  
33  
34  
35  
36  
37  
38  
39  
40  
41  
42  
43  
44  
45  
46  
47  
48  
49  
50  
51  
52  
53  
54  
55  
56  
57  
58  
59  
60  
61  
62  
63  
64  
65

20 **ABSTRACT**

21 **Background:** Shotgun metagenomics provides powerful insights into microbial community  
22 biodiversity and function. Unfortunately, inferences from metagenomic studies are often limited  
23 by dataset size and complexity, and are restricted by the availability and completeness of  
24 existing databases. *De novo* comparative metagenomics enables the comparison of  
25 metagenomes based on their total genetic content.

26 **Results:** We developed a novel tool called Libra that performs all-vs-all comparison of  
27 metagenomes based on their k-mer-composition. This tool presents three main innovations: the  
28 use of a scalable Apache Hadoop framework enabling massive dataset comparison, the use of  
29 complex distance metrics allowing precise clustering of metagenomes based on their k-mer  
30 content, and a web-based tool imbedded in iMicrobe (<http://imicrobe.us>) that uses the CyVerse  
31 advanced cyberinfrastructure to promote broad use of the tool by the scientific community.

32 **Conclusions:** A comparison of Libra to equivalent tools using both simulated and real  
33 metagenomic datasets, ranging from 80 million to 4.2 billion reads, reveals that numerous  
34 methods commonly implemented to reduce compute time for large datasets—such as data  
35 reduction, read count normalization, and presence/absence distance metrics—greatly diminish  
36 the degree of resolution and robustness of large-scale comparative analyses. In contrast, Libra  
37 provides scalable high-resolution comparisons using all reads without biases due to differences  
38 in abundance and read depth, enabling global-scale analyses to identify microbial signatures  
39 linked to biological processes.

40 **Keywords:** metagenomics, Hadoop, k-mer, distance metrics, clustering

41

42

## 43 INTRODUCTION

44 Over the last decade, scientists have generated petabytes of genomic data to uncover the role  
 45 of microbes in dynamic living systems. Yet to understand the underlying biological principles  
 46 that guide the distribution of microbial communities, massive ‘omics datasets need to be  
 47 compared with environmental factors to find linkages across space and time. One of the  
 48 greatest challenges in these endeavors has been in documenting and analyzing unexplored  
 49 genetic diversity in wild microbial communities. For example, fewer than 60% of 40 million non-  
 50 redundant genes from the Global Ocean Survey (GOS) and the Tara Oceans Expeditions match  
 51 known proteins in bacteria [1,2]. Other microorganisms such as viruses or pico- eukaryotes that  
 52 are important to ocean ecosystems are even less well defined (e.g. < 7% of reads from viromes  
 53 match known proteins [3]). This is largely due to the fact that reference genomes for these  
 54 organisms do not exist in public data repositories and genome-sequences from metagenomic  
 55 data await better taxonomic and functional definition. As a result, even advanced tools such as  
 56 k-mer based classifiers that rapidly assign metagenomic reads to known microbes (Table 1)  
 57 miss “microbial dark matter” that comprises a significant proportion of metagenomes.

Table 1.

| Tool         | Area* | Method                        | Platform      | Command line | Parallelized | Scalable** | Web-enabled | Cyber-infrastructure | Cited by      | Year |
|--------------|-------|-------------------------------|---------------|--------------|--------------|------------|-------------|----------------------|---------------|------|
| <b>Libra</b> | MG    | Pairwise distance calculation | <b>Hadoop</b> | X            | X            | X          | X           | X                    | current study |      |
| Compareads   | MG    | Pairwise distance calculation | single server | X            |              |            |             |                      | 35            | 2012 |
| Commet       | MG    | Pairwise distance calculation | single server | X            |              |            |             |                      | 30            | 2014 |
| Mash         | G/MG  | Pairwise distance calculation | single server | X            |              |            |             |                      | 157           | 2016 |
| Simka        | MG    | Pairwise distance calculation | HPC***        | X            | X            |            |             |                      | 18            | 2016 |
| NBC          | MG    | Taxonomic profiling           | singer server | X            |              |            |             |                      | 168           | 2010 |
| Kraken       | MG    | Taxonomic profiling           | singer server | X            |              |            |             |                      | 785           | 2014 |
| FOCUS        | MG    | Taxonomic profiling           | singer server | X            |              |            | X           |                      | 49            | 2014 |
| Clark        | MG    | Taxonomic profiling           | singer server | X            |              |            |             |                      | 176           | 2015 |

|    |            |      |                              |               |   |   |   |     |      |
|----|------------|------|------------------------------|---------------|---|---|---|-----|------|
| 1  |            |      |                              |               |   |   |   |     |      |
| 2  |            |      |                              |               |   |   |   |     |      |
| 3  |            |      |                              |               |   |   |   |     |      |
| 4  |            |      |                              |               |   |   |   |     |      |
| 5  | Metaphlan2 | MG   | Taxonomic profiling          | singer server | X |   |   | 227 | 2015 |
| 6  | Metafast   | MG   | Taxonomic profiling          | single server | X |   |   | 19  | 2016 |
| 7  | Centrifuge | MG   | Taxonomic profiling          | single server | X |   |   | 78  | 2016 |
| 8  | Jellyfish  | G/MG | K-mer counting               | single server | X |   |   | 746 | 2011 |
| 9  | BioPig     | G/MG | K-mer counting               | Hadoop        | X | X | X | 97  | 2013 |
| 10 | Bloomfish  | G/MG | K-mer counting               | Hadoop        | X | X | X | 2   | 2017 |
| 11 | Myrna      | G    | Differential gene expression | Hadoop        | X | X | X | 331 | 2010 |
| 12 | Eoulsan    | G    | Differential gene expression | Hadoop        | X | X | X | 90  | 2012 |
| 13 | Cloud RSD  | G    | Ortholog detection           | Hadoop        | X | X | X | 120 | 2010 |
| 14 | CloudBLAST | G    | Read mapping (ref db)        | Hadoop        | X | X | X | 362 | 2008 |
| 15 | Cloudburst | G    | Read mapping (ref genome)    | Hadoop        | X | X | X | 711 | 2009 |
| 16 | Crossbow   | G    | Variant detection            | Hadoop        | X | X | X | 501 | 2009 |

\* MG = metagenomics; G = genomics

\*\* Scalability is defined as reliable distributed high-performance computing framework

\*\*\* High-performance computer

58

59 **De novo comparative metagenomics offers a path forward.** In order to examine the  
60 complete genomic content, metagenomic samples can be compared using their sequence  
61 signature (or frequency of k-mers; Table 1). This approach relies on three core tenets of k-mer-  
62 based analytics: (i) closely related organisms share k-mer profiles and cluster together, making  
63 taxonomic assignment unnecessary [4,5], (ii) k-mer frequency is correlated with the abundance  
64 of an organism [6], and (iii) k-mers of sufficient length can be used to distinguish specific  
65 organisms [7]. In 2012, the Compareads [8] method was proposed, followed by Commet [9].  
66 Both of these tools compute the number of shared reads between metagenomes using a k-mer-  
67 based read similarity measure. The number of shared reads between datasets is then used to  
68 compute a Jaccard distance between samples. Given the computational intensity of all-vs-all  
69 sequence analysis, several other methods have been employed to reduce the dimensionality of  
70 metagenomes and speed up analyses by creating unique k-mer sets and computing the genetic  
71 distance between pairs of metagenomes, such as MetaFast [10] and Mash [11]. The fastest of  
72 these methods, Mash, indexes samples by unique k-mers to create size-reduced sketches, and  
73 compares these sketches using the min-Hash algorithm [12] for computing a genetic distance

1  
2  
3  
4 74 using Jaccard similarity. Yet, the tradeoff for speed is that samples are reduced to a subset of  
5  
6 75 unique k-mers (1k by default) that lack information on k-mer abundance in the samples. Further,  
7  
8 76 given that Mash uses Jaccard similarity only the genetic distance between samples is  
9  
10 77 accounted for (or genetic content in microbial communities) without considering abundance  
11  
12 78 (dominant vs rare organisms in the sample) which is central to microbial ecology and ecosystem  
13  
14 79 processes.

15  
16  
17 80 Recently, SIMKA [13] was developed to compute a distance matrix between metagenomes by  
18  
19 81 dividing the input datasets into abundance vectors from subsets of k-mers, then rejoining the  
20  
21 82 resulting abundances in a cumulative distance matrix. The methodology can be parallelized to  
22  
23 83 execute the analyses on a high-performance compute cluster (HPC). SIMKA also provides  
24  
25 84 various ecological distance metrics to let the user choose the metric most relevant to their  
26  
27 85 analysis. However, the computational time varies based on the distance metric, where simple  
28  
29 86 distances scale linearly and complex distances metrics scale quadratically as additional  
30  
31 87 samples are added [13]. Moreover, SIMKA normalizes datasets in an all-vs-all comparison by  
32  
33 88 reducing the depth of sequencing for all samples to the least common denominator, therefore  
34  
35 89 decreasing the resolution of the datasets. Lastly, computing k-mer analytics using HPC is  
36  
37 90 subject to reduced fault tolerance for massive datasets.

38  
39  
40 91 **Scaling sequence analysis using big data analytics via Hadoop.** Hadoop is an attractive  
41  
42 92 platform for performing large-scale sequence analysis because it provides a distributed file  
43  
44 93 system and distributed computation for analyzing massive amounts of data. Hadoop clusters are  
45  
46 94 comprised of commodity servers so that the processing power increases as more computing  
47  
48 95 resources are added. Hadoop also offers a high-level programming abstraction based on  
49  
50 96 MapReduce that greatly simplifies the implementation of new analytical tools. Programmers do  
51  
52 97 not need specialized training in distributed systems and networking to implement distributed  
53  
54 98 programs using Hadoop. Hadoop also provides fault-tolerance by default. When a Hadoop node  
55  
56 99 fails, Hadoop reassigns the failed node's tasks to another node containing a redundant copy of  
57  
58  
59  
60  
61  
62  
63  
64  
65



1  
2  
3  
4 100 the data those jobs were processing. This differs from HPC where schedulers track failed nodes  
5  
6 101 and either restart the failed computation from the most recent checkpoint, or from the beginning  
7  
8 102 if checkpointing wasn't used. Thus, using a Hadoop infrastructure ensures that computations  
9  
10 103 and data are protected even in the event of hardware failures. These benefits have led to new  
11  
12 104 analytic tools based on Hadoop, making Hadoop a de facto standard in large-scale data  
13  
14 105 analysis. In metagenomics, the development of efficient and inexpensive high-throughput  
15  
16 106 sequencing technologies has led to a rapid increase of the amount of sequence data for  
17  
18 107 studying microbes in diverse environments. However, no Hadoop-enabled comparative  
19  
20 108 metagenomics tools currently exist.

21  
22  
23  
24 109 Spark [14] is increasingly popular for scientific data analysis [15] because of its outstanding  
25  
26 110 performance provided by fast in-memory processing. Although Libra is currently implemented  
27  
28 111 on Hadoop, Libra can be easily ported to Spark because both Hadoop and Spark have similar  
29  
30 112 interfaces for data processing and partitioning. For example, Resilient Distributed Datasets  
31  
32 113 (RDD) can be partitioned and distributed over a Spark cluster using Libra's k-mer range  
33  
34 114 partitioning. RDDs are memory-resident, allowing Spark to significantly improve the  
35  
36 115 performance of Libra's k-mer counting and distance matrix computation by avoiding slow disk  
37  
38 116 I/O for intermediate data. Nevertheless, we implemented Libra using Hadoop because Spark  
39  
40 117 requires much more RAM than Hadoop, significantly increasing the cost of the cluster.

41  
42 118 **Existing big data algorithms compare reads to limited genomic reference data.** Recent  
43  
44 119 progress has been made in translating bioinformatics algorithms to big data architectures to  
45  
46 120 overcome scalability issues for genomic but not metagenomic applications (Table 1). Thus far,  
47  
48 121 these algorithms compare large-scale NGS datasets to reference genomic datasets and replace  
49  
50 122 computationally intensive algorithms such as sequence alignment [16], genetic variant detection  
51  
52 123 [17,18], or short read mapping [19–22]. For example, BlastReduce and CloudBurst are parallel  
53  
54 124 sequence mapping tools based on Apache MapReduce [20,21]. These tools, however,  
55  
56 125 implement a query-to-a-reference approach that is inefficient for all-vs-all analyses of reads from  
57  
58  
59  
60  
61  
62  
63  
64  
65

1  
2  
3  
4 126 metagenomes. Other algorithms such as BioPig [23] and Bloomfish [24] generate an index of  
5  
6 127 sequence data for later partial sequence search and k-mer counting using MapReduce [25].  
7  
8 128 These tools, however, adopt a suffix array approach similar to traditional bioinformatics tools  
9  
10 129 that is inefficient in reading and indexing data on a distributed file system such as Hadoop, thus  
11  
12 130 reducing performance. Moreover, neither tool offers an end-to-end solution for comparing  
13  
14 131 metagenomes consisting of: data distribution on a Hadoop cluster, k-mer indexing and counting,  
15  
16 132 distance computation, and visualization. Finally, none of these tools are enabled in an advanced  
17  
18 133 cyberinfrastructure where users can compute analyses in a simple web-based platform that  
19  
20 134 offers compute, data storage, and analysis tools.  
21  
22  
23  
24 135 **Libra: a tool for scalable all-vs-all sequence analysis in an advanced cyberinfrastructure**  
25  
26 136 Here, we describe a scalable algorithm called Libra that is capable of performing all-vs-all  
27  
28 137 sequence analysis using MapReduce on the Apache Hadoop platform. We demonstrate for the  
29  
30 138 first time that Hadoop can be applied to all-vs-all sequence comparisons of large-scale  
31  
32 139 metagenomic datasets comprised of mixed microbial communities. We present a new distance  
33  
34 140 metric for comparing datasets using Cosine Similarity [34] to consider genetic distance and  
35  
36 141 microbial abundance simultaneously, along with widely accepted distance metrics in biology  
37  
38 142 such as Bray-Curtis [35] and Jensen-Shannon [36]. We validate this new distance metric using  
39  
40 143 simulated metagenomes to show that Libra has exceptional sensitivity in distinguishing complex  
41  
42 144 mixed microbiomes. Next, we show Libra's ability to distinguish metagenomes by both  
43  
44 145 community composition and abundance using 48 samples (16S rRNA and WGS) from the  
45  
46 146 human microbiome project (HMP) across diverse body sites, and compare the results to Mash  
47  
48 147 and SIMKA. Finally, we show that Libra can scale to massive global-scale datasets by  
49  
50 148 examining viral diversity in 43 Tara Ocean Viromes (TOV) from the 2009-2011 Expedition [27]  
51  
52 149 that represent 26 sites containing about 4.2 billion reads. The resulting data demonstrate that  
53  
54 150 Libra provides accurate, efficient, and scalable compute for comparative metagenomics that can  
55  
56 151 be used to discern global patterns in microbial ecology.  
57  
58  
59  
60  
61  
62  
63  
64  
65

1  
2  
3  
4  
5  
6  
7  
8  
9  
10  
11  
12  
13  
14  
15  
16  
17  
18  
19  
20  
21  
22  
23  
24  
25  
26  
27  
28  
29  
30  
31  
32  
33  
34  
35  
36  
37  
38  
39  
40  
41  
42  
43  
44  
45  
46  
47  
48  
49  
50  
51  
52  
53  
54  
55  
56  
57  
58  
59  
60  
61  
62  
63  
64  
65

152 To promote the broad use of the Libra algorithm we developed a web-based tool in iMicrobe  
153 (<http://imicrobe.us>), where users can run Libra using data in their free CyVerse [28,29] account  
154 or use datasets that are integrated into the iMicrobe Data Commons. These analyses are  
155 fundamental for determining relationships among diverse metagenomes to inform follow-up  
156 analyses on microbial-driven biological processes.

157 **DATA DESCRIPTION**

158 **Staggered mock community.** We performed metagenomic shotgun sequencing on a  
159 staggered mock community obtained from the Human Microbiome Consortium (HM-277D). The  
160 staggered mock community is comprised of genomic DNA from genera commonly found on or  
161 within the human body, consisting of 1,000 to 1,000,000,000 16S rRNA gene copies per  
162 organism per aliquot. The resulting DNA was subjected to whole genome sequencing as  
163 follows. Mixtures were diluted to a final concentration of 1 nanogram/microliter and used to  
164 generate whole genome sequencing libraries with the Ion Xpress Plug Fragment Library Kit and  
165 manual #MAN0009847, revC (Thermo Fisher Scientific, Waltham, MA, USA). Briefly, 10  
166 nanograms of bacterial DNA was sheared using the Ion Shear enzymatic reaction for 12 min  
167 and Ion Xpress barcode adapters ligated following end repair. Following barcode ligation,  
168 libraries were amplified using the manufacturer's supplied Library Amplification primers and  
169 recommended conditions. Amplified libraries were size selected to ~ 200 base pairs using the  
170 Invitrogen E-gel Size Select Agarose cassettes as outlined in the Ion Xpress manual and  
171 quantitated with the Ion Universal Library quantitation kit. Equimolar amounts of the library were  
172 added to an Ion PI Template OT2 200 kit V3. The resulting templated beads were enriched with  
173 the Ion OneTouch ES system and quantitated with the Qubit Ion Sphere Quality Control kit (Life  
174 Technologies) on a Qubit 3.0 fluorometer (Qubit, NY, NY, USA). Enriched templated beads  
175 were loaded onto an Ion PI V2 chip and sequenced according to the manufacturer's protocol  
176 using the Ion PI Sequencing 200 kit V3 on a Ion Torrent Proton sequencer. The sequence data

1  
2  
3  
4 177 comprised of ~80 million reads have been deposited to the NCBI Sequence Read Archive under  
5  
6 178 accession SRP115095 under project accession PRJNA397434.  
7  
8  
9 179 **Simulated data derived from the staggered mock community.** The resulting sequence data  
10  
11 180 from the staggered mock community (~80 million reads) were used to develop simulated  
12  
13 181 metagenomes to test the effects of varying read depth, and composition and abundance of  
14  
15 182 organisms in mixed metagenomes. To examine read depth (in terms of raw read counts and file  
16  
17 183 size), we used the known staggered mock community abundance profile to generate an artificial  
18  
19 184 metagenome using GemSim [30] of 2 million reads (454 sequencing) and duplicated the dataset  
20  
21 185 2x, 5x and 10x. We also simulated the effects of sequencing a metagenome more deeply using  
22  
23 186 GemSim [30] to generate simulated metagenomes with 0.5, 1, 5, and 10 million reads based on  
24  
25 187 the relative abundance of organisms in the staggered mock community. Next, we developed  
26  
27 188 four simulated metagenomes to test the effect of changing the dominant organism abundance  
28  
29 189 and genetic composition including: 10 million reads from the staggered mock community (mock  
30  
31 190 1), the mock community with alterations in a few abundant species (mock 2), the mock  
32  
33 191 community with many alterations in abundant species (mock 3), and mock 3 with additional  
34  
35 192 sequences from archaea to further alter the genetic composition (mock 4) as described in  
36  
37 193 Supplemental Table 1. All simulated datasets are available in iMicrobe (<http://imicrobe.us>).  
38  
39  
40  
41  
42  
43 194 **Human microbiome 16S rRNA gene amplicons and WGS reads.** Human microbiome  
44  
45 195 datasets were downloaded from the NIH Human microbiome project [31] including 48 samples  
46  
47 196 from 5 body sites including: urogenital (posterior fomix), gastrointestinal (stool), oral (buccal  
48  
49 197 mucosa, supragingival plaque, tongue dorsum), airways (anterior nares), and skin  
50  
51 198 (retroauricular crease left and right; Supplemental Table 2). Matched datasets consisting of 16S  
52  
53 199 rRNA reads, WGS reads, and WGS assembled contigs were downloaded from the 16S trimmed  
54  
55 200 dataset and the HMIWGS/HMASM dataset respectively. For the WGS reads dataset, the  
56  
57 201 analysis was run on the paired 1 read file.  
58  
59  
60  
61  
62  
63  
64  
65

1  
2  
3  
4  
5  
6  
7  
8  
9  
10  
11  
12  
13  
14  
15  
16  
17  
18  
19  
20  
21  
22  
23  
24  
25  
26  
27  
28  
29  
30  
31  
32  
33  
34  
35  
36  
37  
38  
39  
40  
41  
42  
43  
44  
45  
46  
47  
48  
49  
50  
51  
52  
53  
54  
55  
56  
57  
58  
59  
60  
61  
62  
63  
64  
65

**Tara ocean viromes.** Tara oceans viromes were downloaded from European Nucleotide Archive (ENA) at EMBL and consisted of 43 viromes from 43 samples at 26 locations across the world's oceans collected during the Tara Oceans (2009-2012) scientific expedition (Supplemental Table 3; [27]). Metadata for the samples was downloaded from PANGAEA [32]. These samples were derived from multiple depths including: 16 surface samples (5-6 meters), 18 deep chlorophyll maximum samples (DCM; 17-148 meters), and one mesopelagic sample (791 meters). Quality control procedures were applied according to methods described by Brum and colleagues [27].

## RESULTS AND DISCUSSION

**Libra computational strategy.** Libra uses Hadoop MapReduce to perform massive all-vs-all sequence comparisons between next-generation sequence (NGS) datasets. Libra is designed to estimate genetic distance accurately without sacrificing performance. Instead, scalable algorithms and efficient resource usage make it feasible to perform all-vs-all comparisons on large datasets.

Libra performs all-vs-all distance comparisons using a sweep line algorithm ([https://en.wikipedia.org/wiki/Sweep\\_line\\_algorithm](https://en.wikipedia.org/wiki/Sweep_line_algorithm)). Naively, all-vs-all comparisons would require a total of  $n \times (n - 1) / 2$  comparisons between  $n$  samples. Using a sweep line algorithm, Libra can perform these comparisons in a single pass (Supplemental Figure 1). Libra maximizes cluster efficiency using a load balancing algorithm inspired by Terabyte Sort [33] to distribute the workload evenly over the Hadoop cluster. Highly parallelizable inverted index construction and distance matrix computation algorithms enable Libra to scale to any size NGS dataset (often millions of reads), and perform any number of comparisons across datasets, making global ecosystem-level analyses possible.

1  
2  
3  
4 **225** **Libra distance calculation.** Libra uses a vector space model to compute the distance between  
5  
6 **226** two NGS datasets. In this model each sample is represented by a vector, each dimension of  
7  
8 **227** which corresponds to a unique k-mer. Each component of a vector indicates the weight given to  
9  
10 **228** the corresponding k-mer in the distance computation. For example, using the frequency (the  
11  
12 **229** raw count) of a k-mer as its weight and using 4-mers, the vector  $\langle 2,4,0,\dots \rangle$  indicates that a k-  
13  
14 **230** mer 'aaaa' has a weight of two and a k-mer 'aaac' has a weight of four in the sample, etc. The  
15  
16 **231** more weight, the more important the k-mer.

17  
18  
19  
20 **232** The distance between two samples can now be measured by comparing their vectors using a  
21  
22 **233** distance metric. Libra provides three distance metrics — Cosine Similarity [34], Bray-Curtis [35]  
23  
24 **234** and Jensen-Shannon [36]. In this paper, we demonstrate Cosine Similarity as the default  
25  
26 **235** distance metric given that it had the shortest runtime for all distances (see Methods).

27  
28  
29  
30 **236** Cosine Similarity determines an estimate of the genetic distance between samples by the angle  
31  
32 **237** between the two vectors. The larger the angle, the larger the distance. The cosine is one when  
33  
34 **238** the angle is zero (i.e. the vectors are identical except for their magnitude) and less than one  
35  
36 **239** otherwise (see Supplemental Methods for a detailed description).

37  
38  
39  
40 **240** The cosine of the angle does not depend on the magnitude (length) of the vectors. This is  
41  
42 **241** advantageous in comparing samples with different sizes of samples (or sequencing depth). For  
43  
44 **242** example, if there are two samples with the same composition of k-mers but one has k-mers with  
45  
46 **243** double the frequency than the other, their vectors will have same angles so that their cosine  
47  
48 **244** similarity will one.

49  
50  
51  
52 **245** **Libra implementation.** We implemented Libra on the Hadoop MapReduce platform. This  
53  
54 **246** allows Libra to run on any standard Hadoop 2.3 implementation, while taking advantage of the  
55  
56 **247** scalability and fault-tolerance features provided by Hadoop. Hadoop allows robust parallel  
57  
58 **248** computation over distributed computing resources via its simple programming interface called  
59  
60  
61  
62  
63  
64  
65

1  
2  
3  
4 249 *MapReduce*, while hiding much of the complexity of distributed computing (e.g. node failures).  
5  
6 250 Taking advantage of Hadoop MapReduce, Libra can scale to larger input datasets and more  
7  
8 251 computing resources. Furthermore, many cloud providers such as Amazon and Google offer  
9  
10 252 Hadoop clusters on a pay-as-you-go basis, allowing scientists to scale their Libra computations  
11  
12 253 to match their datasets and budgets.

13  
14  
15  
16 254 Libra is implemented using three different MapReduce jobs — 1) k-mer histogram construction,  
17  
18 255 2) inverted index construction, and 3) distance matrix computation. Figure 1 shows a workflow  
19  
20  
21 256 of the Libra algorithm.

22  
23  
24 257 **Figure 1. The Libra Workflow.**

25  
26 258 Libra consists of three MapReduce jobs (yellow boxes) — 1) k-mer histogram construction, 2)  
27  
28 259 inverted index construction and 3) distance matrix computation. k-mer histograms are first  
29  
30 260 constructed for input samples to balance workloads over the Hadoop cluster during the  
31  
32 261 subsequent jobs. Inverted indices are constructed per a group of samples in parallel by  
33  
34 262 partitioning k-mer ranges. An index chunk is produced from each partition and an inverted index  
35  
36 263 is constructed from multiple index chunks. During the distance matrix computation, partial  
37  
38 264 contributions are computed within a partition and accumulated to produce the final distance  
39  
40 265 matrix.

41  
42  
43 266 Libra constructs a k-mer histogram of the input samples for load-balancing. A separate Map  
44  
45 267 task is spawned for every data block in the input sample files to calculate the k-mer histogram  
46  
47 268 for each sample. Thus, the k-mer histogram of the input samples is computed in parallel by  
48  
49 269 running multiple Map tasks and a Reduce task that combines their results.

50  
51  
52  
53 270 Libra performs the inverted index construction in parallel. In the Map phase, a separate Map  
54  
55 271 task is spawned for every data block in the input sample files. Each Map task generates k-mers  
56  
57 272 from the sequences stored in a data block then passes them to the Reduce tasks. In the

1  
2  
3  
4 273 Reduce phase, the I/O and computation is split by partitioning the k-mer space using the k-mer  
5  
6 274 histograms computed in the first phase (Supplemental Figure 2). A separate Reduce task is  
7  
8 275 spawned for every partition and a custom Partitioner routes the produced k-mers to Reduce  
9  
10 276 tasks by their k-mer ranges. Each Reduce task then counts k-mers it receives and produces an  
11  
12 277 index chunk. As a result, each index chunk is stored as a separate file in the Hadoop MapFile  
13  
14 278 format. The MapFile is well-suited for Libra as it is designed to store key-value pairs in key  
15  
16 279 order, and supports binary search of the keys.  
17  
18  
19  
20 280 In the distance matrix computation, the work is split by partitioning the k-mer space in the  
21  
22 281 beginning of a MapReduce job. The k-mer histogram files for input samples are loaded and  
23  
24 282 merged, and the k-mer space is partitioned according to the k-mer distributions. A separate Map  
25  
26 283 task is spawned for each partition to perform the computation in parallel. As a result, each task  
27  
28 284 produces an output file containing partial contributions to the score matrix. At the end of the job,  
29  
30 285 Libra merges the partial contributions from the files and produces the complete distance matrix.  
31  
32  
33  
34  
35 286 **Advanced cyberinfrastructure for Libra in iMicrobe.** To improve access to Libra we made it  
36  
37 287 available at iMicrobe (<https://www.imicrobe.us>). A researcher with a CyVerse account can run  
38  
39 288 Libra on iMicrobe by filling-out a simple web form specifying the input files and parameters.  
40  
41 289 Input files are selected from the CyVerse Data Store where they have either been uploaded by  
42  
43 290 the user to their home directory or are part of the iMicrobe Data Commons. When a job is  
44  
45 291 submitted, the user is presented with the status of the job, and on completion the output files  
46  
47 292 and visualization of results. To deploy Libra on iMicrobe, we developed a job dispatch service to  
48  
49 293 automate execution of Libra on a University of Arizona Hadoop cluster. The service is written in  
50  
51 294 NodeJS and accepts a JSON description of the job inputs and parameters, stages the input files  
52  
53 295 onto the UA Hadoop cluster, executes Libra with the given parameters, and transfers the  
54  
55 296 resulting output files to the user's home directory in the CyVerse Data Store. The service  
56  
57  
58  
59  
60  
61  
62  
63  
64  
65



1  
2  
3  
4 297 provides a RESTful interface that mimics the Agave API Jobs service and is secured using an  
5  
6 298 Agave OAuth2 token. Source code is located at <https://github.com/hurwitzlab/occ-plan-b>.  
7  
8  
9 299 **Cosine similarity allows for an accurate and normalized comparison of metagenomes.**  
10  
11 300 Jaccard and Bray-Curtis distance have been extensively used to compare metagenomes based  
12  
13 301 on their sequence signature [10,11,13]. While Mash only computes the Jaccard distance  
14  
15 302 between samples, Simka and Libra implement several classical ecology distances allowing the  
16  
17 303 user to choose the best-suited distance for the considered dataset [13]. Moreover, Libra  
18  
19 304 implements a new distance metric, the cosine similarity. Users can also weight k-mers based on  
20  
21 305 their abundance in Libra (using boolean weighting, natural weighting and logarithmic weighting)  
22  
23 306 to account for differences in microbial community composition and sequencing effort as detailed  
24  
25 307 below.  
26  
27  
28 308 We tested these effects by varying: (1) the size of the datasets, (2) depth of sequencing, (3) the  
29  
30 309 abundance of dominant microbes in the community, and (4) genetic composition of the  
31  
32 310 community by adding in an entirely new organism (in our case we added archaea). We  
33  
34 311 constructed simulated metagenomes and compared Libra's distance based on the cosine  
35  
36 312 similarity against those from Mash and SIMKA. Simulated datasets were derived from genomic  
37  
38 313 DNA from a staggered mock community of bacteria obtained from the human microbiome  
39  
40 314 consortium and sequenced deeply using the Ion Torrent sequencing platform (80 million reads,  
41  
42 315 see Methods).  
43  
44  
45 316 First, we examined the effect of the size of the dataset by using GemSim [30] to obtain a  
46  
47 317 simulated metagenome composed of 1 million reads from the mock community and duplicating  
48  
49 318 that dataset 2x and 10x. Overall, we found that altering the size of the metagenome (by  
50  
51 319 duplicating the data) had no effect on the distance between metagenomes for Mash, SIMKA, or  
52  
53 320 Libra. In each case the distance of the duplicated datasets to the 1x mock community was less  
54  
55 321 than 0.0001 (data not shown).  
56  
57  
58  
59  
60  
61  
62  
63  
64  
65

1  
2  
3  
4 322 Because metagenomes don't scale exactly with size and instead have an increasing  
5  
6 323 representation of low-abundance organisms, we created a second simulated dataset from the  
7  
8 324 mock community using GemSim [30] 0.5, 1, 5, and 10 million reads (454 sequencing) to mimic  
9  
10 325 the effect of sequencing more deeply. Given the abundance of organisms in the mock  
11  
12 326 community, the 0.5 M read dataset is mainly comprised of dominant species. With increased  
13  
14 327 sequencing depth (1, 5, and 10 M reads) additional species are added relative to their  
15  
16 328 abundance in the mock community. Overall, sequencing depth has little effect on the distance  
17  
18 329 between samples in Mash and Libra (natural weighting), whereas SIMKA shows no changes  
19  
20 330 between samples when using Jaccard and Bray-Curtis distances (Figure 2A). Indeed, SIMKA  
21  
22 331 normalization is implemented as follows: the smallest sample from the dataset is determined  
23  
24 332 and its number of sequences is used to compare the samples (in this experiment, all mock  
25  
26 333 communities were compared based on the first 0.5 million reads). These results suggest that  
27  
28 334 Libra (natural weighting) and Mash are appropriate for comparing datasets at different  
29  
30 335 sequencing depths, whereas using SIMKA could lead to undesired effects.

31  
32  
33  
34  
35  
36 336 **Figure 2. Analysis of artificial metagenomes using Mash, SIMKA and Libra.**

37  
38  
39 337 A. Distance to staggered mock community artificial metagenome composed of 10 million  
40  
41 338 reads (mock1 10M), for artificial metagenomes of same community sequenced at  
42  
43 339 various depth. Artificial metagenomes were obtained using GemSim and the known  
44  
45 340 abundance profile of the staggered mock community (see Supplemental Table 1). In  
46  
47 341 order to mimic various sequencing depth, the artificial metagenomes were generated at  
48  
49 342 0.5, 1, 5 or 10 million reads (noted mock1 0.5M; mock1 1M; mock1 5M; mock1V2 10M).  
50  
51 343 The distances between the 4 artificial metagenomes and a 10 million read artificial  
52  
53 344 metagenome (mock1 10M) were computing using Mash, SIMKA (Jaccard and Bray-  
54  
55 345 curtis distance) and Libra (natural weighting).

56  
57  
58  
59 346 B. Distance to staggered mock community artificial metagenome (mock 1), for artificial  
60  
61  
62  
63  
64  
65

1  
2  
3  
4 347 metagenomes from increasingly distant communities. The mock 1 relies on the known  
5  
6 348 abundance profile from the staggered mock community. The mock 2 community profile  
7  
8  
9 349 was obtained by randomly inverting 3 species abundance from mock 1 profile. The mock  
10  
11 350 3 profile was obtained by randomly inverting 2 species abundances from mock 2 profile.  
12  
13 351 Finally, mock 4 profile was obtained by adding high abundance archeal genomes not  
14  
15 352 present in any the other mock communities. Artificial metagenomes were generated  
16  
17 353 using GemSim at 10 million reads. The distance between the mock 1 community to  
18  
19  
20 354 mock 2, mock 3, mock 4 and a replicate community (mock1 V2) was computed using  
21  
22 355 Mash, SIMKA (Jaccard and Bray-curtis distance) and LIBRA (cosine distance, natural  
23  
24 356 and logarithmic weighting).

26 357 In addition to natural variation in population-level abundances, artifacts from sequencing can  
27  
28  
29 358 result in high-abundance k-mers. Libra allows users to select the optimal methodology for  
30  
31 359 weighting high abundance k-mers in their datasets including boolean, natural, and logarithmic.  
32  
33 360 These options for weighting k-mers are important for different biological scenarios as described  
34  
35 361 below and shown in simulated datasets. To examine the effect of weighting, we compared and  
36  
37  
38 362 contrasted the natural and logarithmic weight in Libra, with other distances obtained from Mash  
39  
40 363 and SIMKA (Jaccard and Bray-Curtis). We also examined the effect of adding an entirely new  
41  
42 364 species by spiking a simulated dataset with sequences derived from archaea (that were not  
43  
44 365 present in the mock community). The simulated datasets were comprised of the staggered  
45  
46 366 mock community (mock 1), the mock community with alterations in a few abundant species  
47  
48  
49 367 (mock 2), the mock community with many alterations in abundant species (mock 3), and mock 3  
50  
51 368 with additional sequences from archaea to alter the genetic composition of the community  
52  
53 369 (mock 4; see Supplemental Table 1). The resulting data showed that Libra (logarithmic  
54  
55 370 weighting) shows a stepwise increase in distance among the mock communities (Figure 2B).  
56  
57  
58 371 This suggests that logarithmic weighting in Libra allows for a comparison of distantly related  
59  
60 372 microbial communities. Mash also shows a stepwise distance between communities, but is

1  
2  
3  
4  
5  
6  
7  
8  
9  
10  
11  
12  
13  
14  
15  
16  
17  
18  
19  
20  
21  
22  
23  
24  
25  
26  
27  
28  
29  
30  
31  
32  
33  
34  
35  
36  
37  
38  
39  
40  
41  
42  
43  
44  
45  
46  
47  
48  
49  
50  
51  
52  
53  
54  
55  
56  
57  
58  
59  
60  
61  
62  
63  
64  
65

373 compressed relative to Libra, making differences less distinct. SIMKA (Bray-Curtis and Jaccard)  
374 and Libra (cosine distance, natural weighting) reach the maximum difference between mock  
375 communities 3 and 4 (Figure 2B). This indicates that these distances are more appropriate  
376 when comparing metagenomes with small fluctuations in the community (e.g., data from a time-  
377 series analysis), whereas Libra (cosine distance, logarithmic weighting) can be used to  
378 distinguish metagenomes that vary in both genetic composition and abundance over a wide-  
379 range of species diversity by dampening the effect of high-abundance k-mers. Because of this  
380 important difference, we used the cosine distance with the logarithmic weighting in all  
381 subsequent analyses. Cosine distance also provided the fastest computation for complex  
382 distance metrics (see Methods).

**383 Libra accurately profiles differences in bacterial diversity and abundance in amplicon  
384 and WGS datasets from the human microbiome.**

385 Microbial diversity is traditionally assessed using two methods: the 16S rRNA gene to classify  
386 bacterial and archaeal groups at the genus to species level, or whole genome shotgun  
387 sequencing (WGS) for finer taxonomic classification at the species or subspecies level. Further,  
388 WGS datasets provide additional information on functional differences between metagenomes.  
389 Here we compare and contrast the effect of different algorithmic approaches (Mash vs Libra vs  
390 SIMKA), distance metric (Libra vs SIMKA), data type (16S rRNA vs WGS), and sequence type  
391 (WGS reads vs assembled contigs) in analyzing data from 48 samples across 8 body sites from  
392 the Human Microbiome Project. Specifically, we examine matched datasets (16S rRNA reads,  
393 WGS reads, and WGS assembled contigs) classified as urogenital (posterior fomix),  
394 gastrointestinal (stool), oral (buccal mucosa, supragingival plaque, tongue dorsum), airways  
395 (anterior nares), and skin (retroauricular crease left and right; Supplemental Table 2).

396 Because the HMP datasets represent microbial communities, abundant bacteria will have more  
397 total read counts than rare bacteria in the samples. Thus, each sample can vary by both taxonomic

1  
2  
3  
4 398 composition (the genetic content of taxa in a sample) and abundance (the relative proportion of  
5  
6 399 those taxa in the samples). Importantly, the 16S rRNA amplicon dataset is useful in showing how  
7  
8  
9 400 well each algorithm performs in detecting and quantifying small-scale variation for single a gene at  
10  
11 401 the genus-level, whereas the WGS dataset demonstrates the effect of including the complete  
12  
13 402 genetic content and abundance of organisms at the species-level in a community [37]. Also, we  
14  
15 403 examine differences in each algorithm when read abundance is excluded using assembled contigs  
16  
17 404 that only represent the genetic composition of the community.  
18  
19  
20  
21 405 Using the 16S rRNA reads, both Mash and Libra clustered samples by broad categories but not  
22  
23 406 individual body-sites (Figure 3A and B). Similar to what is described in previous work [13], samples  
24  
25 407 from the airways and skin co-cluster, whereas other categories including urogenital,  
26  
27 408 gastrointestinal, and oral are distinct [13]. These results indicate that limited variation in the 16S  
28  
29 409 rRNA gene may only allow for clustering for broad categories. Further, the Mash algorithm shows  
30  
31  
32 410 lower overall resolution (Figure 3A) as compared to Libra (Figure 3B). Indeed, amplicon  
33  
34 411 sequencing analysis is not an intended use of Mash, given that it reduces the dimensionality of the  
35  
36 412 data by looking at presence/absence of unique k-mers, whereas Libra examines the complete  
37  
38 413 dataset accounting for both composition in organisms and their abundance. In contrast, SIMKA  
39  
40 414 (Jaccard-ab and Bray-Curtis) failed to cluster samples by broad categories: some skin samples are  
41  
42 415 found associated with stool and formix samples (Figure 3C and D). Moreover, SIMKA Jaccard-ab  
43  
44 416 fails to cluster the mouth samples together (Figure 3C). This result suggests that applying SIMKA  
45  
46  
47 417 and these well-used distance metrics are not appropriate for these datasets.  
48  
49

50  
51 418 **Figure 3. Clustering of HMP 16S rRNA datasets using Mash, Libra and SIMKA.**

52  
53 419 48 Human metagenomic samples from the HMP projects clustered by Mash (A), Libra (B) or  
54  
55 420 SIMKA using Jaccard-ab (C) and Bray-Curtis distances (D) from 16s sequencing runs. The  
56  
57 421 samples were clustered using Ward's method on their distance scores. Heat maps illustrate the  
58  
59  
60  
61  
62  
63  
64  
65

1  
2  
3  
4  
5  
6  
7  
8  
9  
10  
11  
12  
13  
14  
15  
16  
17  
18  
19  
20  
21  
22  
23  
24  
25  
26  
27  
28  
29  
30  
31  
32  
33  
34  
35  
36  
37  
38  
39  
40  
41  
42  
43  
44  
45  
46  
47  
48  
49  
50  
51  
52  
53  
54  
55  
56  
57  
58  
59  
60  
61  
62  
63  
64  
65

422 pairwise dissimilarity between samples, scaled between 0 (green) and 1 (red). A key below the  
423 heatmap colors the samples by body sites.

424 When using WGS reads, both Mash and Libra show enhanced clustering by body-site (Figure 4A  
425 and B), however Mash shows decreased resolution (Figure 4A) as compared to Libra (Figure 4B).  
426 Again, these differences reflect the effect of using all of the read data (Libra) rather than a subset  
427 (Mash). Importantly, the Libra algorithm also depends on read abundance that provides increased  
428 resolution for interpersonal variation as seen in skin samples (Figure 4B). Similar to the 16S rRNA  
429 datasets, SIMKA (Jaccard-ab and Bray-Curtis) failed to cluster the samples by body site, where  
430 some skin and stool samples cluster with formix samples (Figure 4C and D). Similarly, SIMKA  
431 Jaccard-ab also fails to cluster the mouth samples together (Figure 4C). Overall SIMKA shows an  
432 enhanced clustering by body-site using WGS data compared to the 16S rRNA data using these  
433 distance metrics, however the clustering is still not accurate.

**Figure 4. Clustering of WGS samples using Mash, and Libra and SIMKA.**

434 48 Human metagenomic samples from the HMP projects clustered by Mash (A), Libra (B) or  
435 Simka using Jaccard-ab (C) and Bray-Curtis distances (D) from whole genome shotgun  
436 sequencing runs. The samples were clustered using Ward's method on their distance scores.  
437 Heat maps illustrate the pairwise dissimilarity between samples, scaled between 0 (green) and  
438 1 (red). A key below the heatmap colors the samples by body sites.  
439  
440 When abundance is taken out of the equation by using assembled contigs (Supplemental Figure 3)  
441 Mash performs well in clustering distinct body sites whereas Libra shows discrepancies and less  
442 overall resolution. Thus, Libra requires reads rather than contigs to perform accurately and obtain  
443 high-resolution clustering (Figure 4). SIMKA (Jaccard-ab and Bray-Curtis) was not able to  
444 distinguish any assembled datasets and scored all sample-to-sample distances to the maximum,  
445 even considering presence-absence distance metric proposed by SIMKA (data not shown). This

1  
2  
3  
4  
5  
6  
7  
8  
9  
10  
11  
12  
13  
14  
15  
16  
17  
18  
19  
20  
21  
22  
23  
24  
25  
26  
27  
28  
29  
30  
31  
32  
33  
34  
35  
36  
37  
38  
39  
40  
41  
42  
43  
44  
45  
46  
47  
48  
49  
50  
51  
52  
53  
54  
55  
56  
57  
58  
59  
60  
61  
62  
63  
64  
65

446 phenomenon may be explained by the normalization method used by SIMKA, which does not  
447 provide enough data to compare the samples when normalized by the smallest number of contigs  
448 (in our dataset 69).

**449 Libra allows for ecosystem-scale analysis: clustering the Tara ocean viromes to unravel  
450 global patterns.**

451 To demonstrate the scale and performance of the Libra algorithm, we analyzed 43 Tara Ocean  
452 Viromes (TOV) from the 2009-2011 Expedition [27] representing 26 sites, 43 samples, and 4.2  
453 billion reads from the global ocean (see methods). Phages (viruses that infect bacteria) are  
454 abundant in the ocean [38] and can significantly impact environmental processes through host  
455 mortality, horizontal gene transfer, and host-gene expression. Yet, how phages change over  
456 space and time in the global ocean and with environmental fluxes is just beginning to be  
457 explored. The primary challenge is the majority of reads in viromes (often > 90%) do not match  
458 known proteins or viral genomes [3] and no conserved genes like the bacterial 16S rRNA gene  
459 exist to differentiate populations. To examine known and unknown viruses simultaneously,  
460 viromes are best compared using sequence signatures to identify common viral populations.  
461 Two approaches exist to cluster viromes based on sequence composition. The first approach  
462 uses protein clustering to examine functional diversity in viromes between sites [3,27,39].  
463 Protein clustering, however, depends on accurate assembly and gene finding that can be  
464 problematic in fragmented and genetically diverse viromes [40]. Further, assemblies from  
465 viromes often only include a fraction of the total reads (e.g., only 1/3 in TOV [27]). To examine  
466 global viral diversity in the ocean using all of the reads we examined TOV using Libra. The  
467 complete pairwise analysis of ~4.2 billion reads in the TOV dataset [27] finished in 18 hours  
468 using a 10-node Hadoop cluster (see Methods and Table 2). Importantly, Libra exhibits  
469 remarkable performance in computing similarity scores, wherein k-mer matches for all TOV  
470 completed within 1.5 hours (Table 2). This step usually represents the largest computational

1  
2  
3  
4  
5  
6  
7  
8  
9  
10  
11  
12  
13  
14  
15  
16  
17  
18  
19  
20  
21  
22  
23  
24  
25  
26  
27  
28  
29  
30  
31  
32  
33  
34  
35  
36  
37  
38  
39  
40  
41  
42  
43  
44  
45  
46  
47  
48  
49  
50  
51  
52  
53  
54  
55  
56  
57  
58  
59  
60  
61  
62  
63  
64  
65

471 bottleneck for bioinformatics tools that compute pairwise distances between sequence pairs for  
472 applications such as hierarchical sequence clustering [41–44].

473 **Table 2. Execution times for the Libra based on the Tara Ocean Virome (TOV) dataset.**

| Stage                                                                            | Execution Time |
|----------------------------------------------------------------------------------|----------------|
| Preprocessing<br>(k-mer histogram construction + Inverted<br>index construction) | 16:32:55       |
| Distance matrix computation                                                      | 1:24:27        |
| Total                                                                            | 17:57:22       |

474  
475 Overall, we found that viral populations in the ocean are largely structured by temperature in  
476 four gradients (Figure 5) similar to their bacterial hosts [2]. Interestingly, samples from different  
477 Longhurst Provinces but the same temperature gradient cluster together. Also, water samples  
478 from the surface (SUR) and deep chlorophyll maximum (DCM) at the same station, cluster more  
479 closely together than samples from the same depth at nearby sites (Figure 5). Also noteworthy,  
480 samples that were derived from extremely cold environments (noted as C0 in Figure 5) lacked  
481 similarity to all other samples (at a 30% similarity score), indicating distinctly different viral  
482 populations. These samples include a mesotrophic sample that have previously been shown to  
483 have distinctly different viral populations than surface ocean samples [45]. Taken together,  
484 these data indicate that viral populations are structured globally by temperature, and at finer  
485 resolution by station (for surface and DCM samples) indicating that micronutrients and local  
486 conditions play an important role in defining viral populations.

487 **Figure 5. Visualizing the genetic distance among marine viral communities using Libra.**



1  
2  
3  
4  
5  
6  
7  
8  
9  
10  
11  
12  
13  
14  
15  
16  
17  
18  
19  
20  
21  
22  
23  
24  
25  
26  
27  
28  
29  
30  
31  
32  
33  
34  
35  
36  
37  
38  
39  
40  
41  
42  
43  
44  
45  
46  
47  
48  
49  
50  
51  
52  
53  
54  
55  
56  
57  
58  
59  
60  
61  
62  
63  
64  
65

488 Distance computed from 43 TOV from the 2009-2012 Tara Oceans Expedition. Lines (edges)  
489 between samples represent the similarity and are colored and thickened accordingly. Lines with  
490 insignificant similarity (less than 30%) are removed. Each of the sample names are color coded  
491 by Longhurst Province. Inner circles show temperature ranges. Sample names show the  
492 temperature range, station, and depth as indicated on the legend.

493

**494 INNOVATIONS**

495 Scientific collaboration is increasingly data driven given large-scale next generation sequencing  
496 datasets. It is now possible to generate, aggregate, archive, and share datasets that are  
497 terabytes and even petabytes in size. Scalability of a system is becoming a vital feature that  
498 decides feasibility of massive 'omic's analyses. In particular, this is important for metagenomics  
499 where patterns in global ecology can only be discerned by comparing the sequence signatures  
500 of microbial communities from massive 'omics datasets, given that most microbial genomes  
501 have not been defined. Current algorithms to perform these tasks run on local workstations or  
502 high-performance computing architectures that cannot scale. Libra presents three main  
503 innovations: the use of a scalable Apache Hadoop framework enabling massive dataset  
504 comparison, the use of sophisticated distance metrics allowing high accuracy and clustering of  
505 the metagenomes based on their k-mer content, and a web-based tool imbedded in the  
506 CyVerse advanced cyberinfrastructure through iMicrobe (<http://imicrobe.us>) for broader use of  
507 the tool in the scientific community. The work described here is the first step in implementing a  
508 cloud-based resource for comparative metagenomics that can be broadly used by scientists to  
509 analyze large-scale shared data resources. Moreover, the code can be ported to any  
510 MapReduce cluster (e.g., Wrangler at TACC, Amazon EMR or private Hadoop clusters). This  
511 computing paradigm is consistent with recent efforts to increase the accessibility of big datasets  
512 in the cloud, such as the Pan Cancer Analyses of Whole Genomes Project [46].

1  
2  
3  
4  
5  
6  
7  
8  
9  
10  
11  
12  
13  
14  
15  
16  
17  
18  
19  
20  
21  
22  
23  
24  
25  
26  
27  
28  
29  
30  
31  
32  
33  
34  
35  
36  
37  
38  
39  
40  
41  
42  
43  
44  
45  
46  
47  
48  
49  
50  
51  
52  
53  
54  
55  
56  
57  
58  
59  
60  
61  
62  
63  
64  
65

## **METHODS**

**Scalability benchmarking for Libra.** We used synthetic datasets for a scalability benchmark. The synthesized datasets consisted of different number of samples, each of which is 10 billion bytes (approximately 9.3 GB). We took samples that are larger than 10 billion bytes from Tara ocean virome dataset and truncated each of them to approximately 10 billion bytes in size while respecting read boundaries. We varied the number of samples to show the scalability of Libra. We used four datasets consisting of 10, 20, 30 and 40 samples in the benchmark. Total sizes of the datasets are 93GB, 186GB, 279GB and 372GB respectively. Each experiment was run three times, and an average of the three runs reported (Supplemental Table 4).

**Figure 6.** Scalability testing for Libra. Four datasets consisting of 10, 20, 30 and 40 samples with total sizes of 93GB, 186GB, 279GB and 372GB, respectively. Runtime of Libra increased linearly with increased input volume and number of input samples. The linear increase of runtime shows that Libra efficiently handles increased volume of input and efficiently computes distances between all sample pairs while the number of sample pairs increases quadratically.

**Benchmarking runtimes of different distance metrics in Libra.** We used the same synthetic dataset with 40 samples (372GB in total) in the scalability benchmarking. We varied the distance metrics and measured the runtimes of Libra. Because all distance metrics share the same index, we reused the index constructed during the scalability benchmarking, thus, runtimes of the inverted index construction for the different metrics are the same. Each experiment was run three times, and an average of the three runs reported (Supplemental Table 4).

**Figure 7.** Runtimes of three different distance metrics (Cosine Similarity, Bray-Curtis and Jensen-Shannon) in Libra with 40 samples of input (372GB in total). Differences in runtimes are mainly due to different computational workload of distance metrics. For example, Jensen-

1  
2  
3  
4 537 Shannon requires more multiplications and divisions in nested loops than cosine similarity,  
5  
6 538 incurring more computational workload. Yet, distance matrix computation with Jensen-Shannon  
7  
8  
9 539 took only 12.64% of total runtime.

10  
11 540 **Experimental Environment Description:**

12  
13 541 **Mash and SIMKA configurations.** Mash v1.1 was run on the metagenomic datasets with the  
14  
15 542 following parameters: -r -s 10000 -m 2 [19]. The analysis of assemblies was run without the  
16  
17 543 parameter “-r”, used for short sequences.

18  
19  
20 544 SIMKA v1.3.2 was run on the metagenomic datasets with the following parameters: -  
21  
22 545 abundance-min 2 -max-reads [MINCOUNT] -simple-dist -complex-dist, where [MINCOUNT] is  
23  
24 546 the smallest sequence count across the analyzed samples.

25  
26  
27 547 **Hadoop cluster configuration.** The Libra experiments described in the paper were performed  
28  
29 548 on a Hadoop cluster consisting of 10 physical nodes (9 MapReduce worker nodes). Each node  
30  
31 549 contains 12 CPUs and 128 GB of RAM, and is configured to run a maximum of 7 YARN  
32  
33 550 containers simultaneously with 10 GB of RAM per container. The remaining system resources  
34  
35 551 are reserved for the operating system and other Hadoop services such as Hive or Hbase.

36  
37  
38  
39 552 **FUNDING**

40  
41 553 This work was supported by the National Science Foundation award #1640775 to BLH and  
42  
43 554 JHH. System support and access for the Hadoop cluster was provided by University of Arizona  
44  
45 555 Information Technology Services. System support and access for the Wrangler cluster was  
46  
47 556 provided by Texas Advanced Computing Center. The following reagent was obtained through  
48  
49 557 BEI Resources, NIAID, NIH as part of the Human Microbiome Project: Genomic DNA from  
50  
51 558 Microbial Mock Community B (Staggered, High Concentration), v5.2H, for Whole Genome  
52  
53 559 Shotgun Sequencing, HM-277D.

54  
55  
56  
57 560

58  
59 561 *Competing interests:* The authors declare no competing interests.  
60  
61  
62  
63  
64  
65

1  
2  
3  
4 **562 Availability and Implementation:**

5  
6 563 Project name: Libra

7 564 Project home page: <http://github.com/iychoi/libra>

8 565 Operating system(s): Hadoop 2.3 or higher

9 566 Programming language: Java

10 567 Other requirements: Java 1.7 or higher

11 568 License: Apache License Version 2.0

12 569 Any restrictions to use by non-academics: No restriction

13 570 Libra web-based App is in iMicrobe under Apps (<http://imicrobe.us>); Code to implement the

14 571 Libra web-based App is in Github (<https://github.com/hurwitzlab/occ-plan-b>).

15 572

16 573 **REFERENCES**

17  
18  
19  
20  
21 574 1. Yooseph S, Sutton G, Rusch DB, Halpern AL, Williamson SJ, Remington K, et al. The  
22 575 Sorcerer II Global Ocean Sampling expedition: expanding the universe of protein families. *PLoS*  
23 576 *Biol.* 2007;5:e16.

24 577 2. Sunagawa S, Coelho LP, Chaffron S, Kultima JR, Labadie K, Salazar G, et al. Structure and  
25 578 function of the global ocean microbiome. *Science.* 2015;348.

26 579 3. Hurwitz BL, Sullivan MB. The Pacific Ocean Virome (POV): a marine viral metagenomic  
27 580 dataset and associated protein clusters for quantitative viral ecology. *PLoS One.*  
28 581 2013;8:e57355.

29 582 4. Dubinkina VB, Ischenko DS, Ulyantsev VI, Tyakht AV, Alexeev DG. Assessment of k-mer  
30 583 spectrum applicability for metagenomic dissimilarity analysis. *BMC Bioinformatics.* 2016;17:38.

31 584 5. Teeling H, Waldmann J, Lombardot T, Bauer M, Glockner FO. TETRA: a web-service and a  
32 585 stand-alone program for the analysis and comparison of tetranucleotide usage patterns in DNA  
33 586 sequences. *BMC Bioinformatics.* 2004;5:163.

34 587 6. Wu Y-W, Ye Y. A novel abundance-based algorithm for binning metagenomic sequences  
35 588 using I-tuples. *J Comput Biol.* [online.liebertpub.com](http://online.liebertpub.com); 2011;18:523–34.

36 589 7. Fofanov Y, Luo Y, Katili C, Wang J, Belosludtsev Y, Powdrill T, et al. How independent are  
37 590 the appearances of n-mers in different genomes? *Bioinformatics.* 2004;20:2421–8.

38 591 8. Mailliet N, Lemaitre C, Chikhi R, Lavenier D, Peterlongo P. Compareads: comparing huge  
39 592 metagenomic experiments. *BMC Bioinformatics.* 2012;13 Suppl 19:S10.

40 593 9. Mailliet N, Collet G, Vannier T, Lavenier D, Peterlongo P. Commet: Comparing and combining  
41 594 multiple metagenomic datasets. 2014 IEEE International Conference on Bioinformatics and  
42 595 Biomedicine (BIBM). 2014. p. 94–8.

43 596 10. Ulyantsev VI, Kazakov SV, Dubinkina VB, Tyakht AV, Alexeev DG. MetaFast: fast  
44 597 reference-free graph-based comparison of shotgun metagenomic data. *Bioinformatics.*  
45 598 2016;32:2760–7.

46 599 11. Ondov BD, Treangen TJ, Melsted P, Mallonee AB, Bergman NH, Koren S, et al. Mash: fast  
47 600 genome and metagenome distance estimation using MinHash. *Genome Biol.* 2016;17:132.

48 601 12. Chum O, Philbin J, Zisserman A. Near Duplicate Image Detection: min-Hash and tf-idf  
49 602 Weighting. *BMVC.* 2008; Available from: <http://www.bmva.org/bmvc/2008/papers/119.pdf>

50 603 13. Benoit G, Peterlongo P, Mariadassou M, Drezen E, Schbath S, Lavenier D, et al. Multiple  
51 604 comparative metagenomics using multiset k-mer counting. *PeerJ Comput Sci.* 2016;2:e94.

52 605 14. Zaharia M, Chowdhury M, Franklin MJ, Shenker S, Stoica I. Spark: Cluster computing with  
53 606 working sets. *HotCloud.* [static.usenix.org](http://static.usenix.org); 2010;10:95.

54 607 15. Guo R, Zhao Y, Zou Q, Fang X, Peng S. Bioinformatics applications on Apache Spark.  
55 608 *Gigascience.* 2018.

1  
2  
3  
4 609 16. Kolker N, Higdon R, Broomall W, Stanberry L, Welch D, Lu W, et al. Classifying proteins into  
5 610 functional groups based on all-versus-all BLAST of 10 million proteins. OMICS.  
6 611 [online.liebertpub.com](http://online.liebertpub.com); 2011;15:513–21.  
7 612 17. McKenna A, Hanna M, Banks E, Sivachenko A, Cibulskis K, Kernysky A, et al. The  
8 613 Genome Analysis Toolkit: a MapReduce framework for analyzing next-generation DNA  
9 614 sequencing data. *Genome Res.* [genome.cshlp.org](http://genome.cshlp.org); 2010;20:1297–303.  
10 615 18. Langmead B, Schatz MC, Lin J, Pop M, Salzberg SL. Searching for SNPs with cloud  
11 616 computing. *Genome Biol.* 2009;10:R134.  
12 617 19. Nguyen T, Shi W, Ruden D. CloudAligner: A fast and full-featured MapReduce based tool  
13 618 for sequence mapping. *BMC Res Notes.* 2011;4:171.  
14 619 20. Schatz MC. BlastReduce: high performance short read mapping with MapReduce.  
15 620 University of Maryland, Available from:  
16 621 [https://www.cs.umd.edu/sites/default/files/scholarly\\_papers/MichaelSchatz\\_1.pdf](https://www.cs.umd.edu/sites/default/files/scholarly_papers/MichaelSchatz_1.pdf)  
17 622 21. Schatz MC. CloudBurst: highly sensitive read mapping with MapReduce. *Bioinformatics.*  
18 623 2009;25:1363–9.  
19 624 22. Pandey RV, Schlötterer C. DistMap: a toolkit for distributed short read mapping on a  
20 625 Hadoop cluster. *PLoS One.* 2013;8:e72614.  
21 626 23. Nordberg H, Bhatia K, Wang K, Wang Z. BioPig: a Hadoop-based analytic toolkit for large-  
22 627 scale sequence data. *Bioinformatics.* 2013;29:3014–9.  
23 628 24. Gao T, Guo Y, Wei Y, Wang B, Lu Y, Cicotti P, et al. Bloomfish: A Highly Scalable  
24 629 Distributed K-mer Counting Framework. 2017 IEEE 23rd International Conference on Parallel  
25 630 and Distributed Systems (ICPADS). 2017. p. 170–9.  
26 631 25. Menon RK, Bhat GP, Schatz MC. Rapid Parallel Genome Indexing with MapReduce.  
27 632 *Proceedings of the Second International Workshop on MapReduce and Its Applications.* New  
28 633 York, NY, USA: ACM; 2011. p. 51–8.  
29 634 26. Salton G, Wong A, Yang CS. A Vector Space Model for Automatic Indexing. *Commun ACM.*  
30 635 New York, NY, USA: ACM; 1975;18:613–20.  
31 636 27. Brum JR, Ignacio-Espinoza JC, Roux S, Doulier G, Acinas SG, Alberti A, et al. Patterns  
32 637 and ecological drivers of ocean viral communities. *Science.* 2015;348.  
33 638 28. Goff SA, Vaughn M, McKay S, Lyons E, Stapleton AE, Gessler D, et al. The iPlant  
34 639 Collaborative: Cyberinfrastructure for Plant Biology. *Front Plant Sci.* 2011;2:34.  
35 640 29. Devisetty UK, Kennedy K, Sarando P, Merchant N, Lyons E. Bringing your tools to CyVerse  
36 641 Discovery Environment using Docker. *F1000Res.* 2016;5:1442.  
37 642 30. McElroy KE, Luciani F, Thomas T. GemSIM: general, error-model based simulator of next-  
38 643 generation sequencing data. *BMC Genomics.* 2012;13:74.  
39 644 31. Human Microbiome Project Consortium. Structure, function and diversity of the healthy  
40 645 human microbiome. *Nature.* 2012;486:207–14.  
41 646 32. Diepenbroek M, Grobe H, Reinke M, Schindler U, Schlitzer R, Sieger R, et al. PANGAEA—  
42 647 an information system for environmental sciences. *Comput Geosci.* 2002;28:1201–10.  
43 648 33. O'Malley O. Terabyte sort on apache hadoop. Yahoo, available online at:  
44 649 <http://sortbenchmark.org/Yahoo-Hadoop.pdf>, (May). Citeseer; 2008;1–3.  
45 650 34. Huang A. Similarity measures for text document clustering. *Proceedings of the sixth new*  
46 651 *zealand computer science research student conference (NZCSRSC2008), Christchurch, New*  
47 652 *Zealand.* 2008. p. 49–56.  
48 653 35. Michie MG. Use of the Bray-Curtis similarity measure in cluster analysis of foraminiferal  
49 654 data. *Math Geol.* 1982;14:661–7.  
50 655 36. Lin J. Divergence measures based on the Shannon entropy. *IEEE Trans Inf Theory.*  
51 656 1991;37:145–51.  
52 657 37. Watts GS, Youens-Clark K, Slepian MJ, Wolk DM, Oshiro MM, Metzger GS, et al. 16S rRNA  
53 658 gene sequencing on a benchtop sequencer: accuracy for identification of clinically important  
54 659 bacteria. *J Appl Microbiol.* 2017;123:1584–96.  
55  
56  
57  
58  
59  
60  
61  
62  
63  
64  
65

1  
2  
3  
4  
5  
6  
7  
8  
9  
10  
11  
12  
13  
14  
15  
16  
17  
18  
19  
20  
21  
22  
23  
24  
25  
26  
27  
28  
29  
30  
31  
32  
33  
34  
35  
36  
37  
38  
39  
40  
41  
42  
43  
44  
45  
46  
47  
48  
49  
50  
51  
52  
53  
54  
55  
56  
57  
58  
59  
60  
61  
62  
63  
64  
65

38. Bergh O, Borsheim KY, Bratbak G, Haldal M. High abundance of viruses found in aquatic environments. *Nature*. 1989;340:467–8.

39. Hurwitz BL, Brum JR, Sullivan MB. Depth-stratified functional and taxonomic niche specialization in the “core” and “flexible” Pacific Ocean Virome. *ISME J*. 2014.

40. Minot S, Wu GD, Lewis JD, Bushman FD. Conservation of gene cassettes among diverse viruses of the human gut. *PLoS One*. 2012;7:e42342.

41. Sun Y, Cai Y, Huse SM, Knight R, Farmerie WG, Wang X, et al. A large-scale benchmark study of existing algorithms for taxonomy-independent microbial community analysis. *Brief Bioinformatics*. 2012;13:107–21.

42. Edgar RC. Search and clustering orders of magnitude faster than BLAST. *Bioinformatics*. 2010;26:2460–1.

43. Niu BF, Fu LM, Sun SL, Li WZ. Artificial and natural duplicates in pyrosequencing reads of metagenomic data. *BMC Bioinformatics*. 2010;11:187.

44. Cai Y, Sun Y. ESPRIT-Tree: hierarchical clustering analysis of millions of 16S rRNA pyrosequences in quasilinear computational time. *Nucleic Acids Res*. 2011;39:e95.

45. Hurwitz BL, Brum JR, Sullivan MB. Depth-stratified functional and taxonomic niche specialization in the “core” and “flexible” Pacific Ocean Virome. *ISME J*. 2015;9:472–84.

46. Weinstein JN, Collisson EA, Mills GB, Shaw KRM, Ozenberger BA, Ellrott K, et al. The cancer genome atlas pan-cancer analysis project. *Nat Genet*. 2013;45:1113–20.

47. Wrangler - Texas Advanced Computing Center. [cited 2017 Dec 20]. Available from: <https://www.tacc.utexas.edu/systems/wrangler>

Figure 1

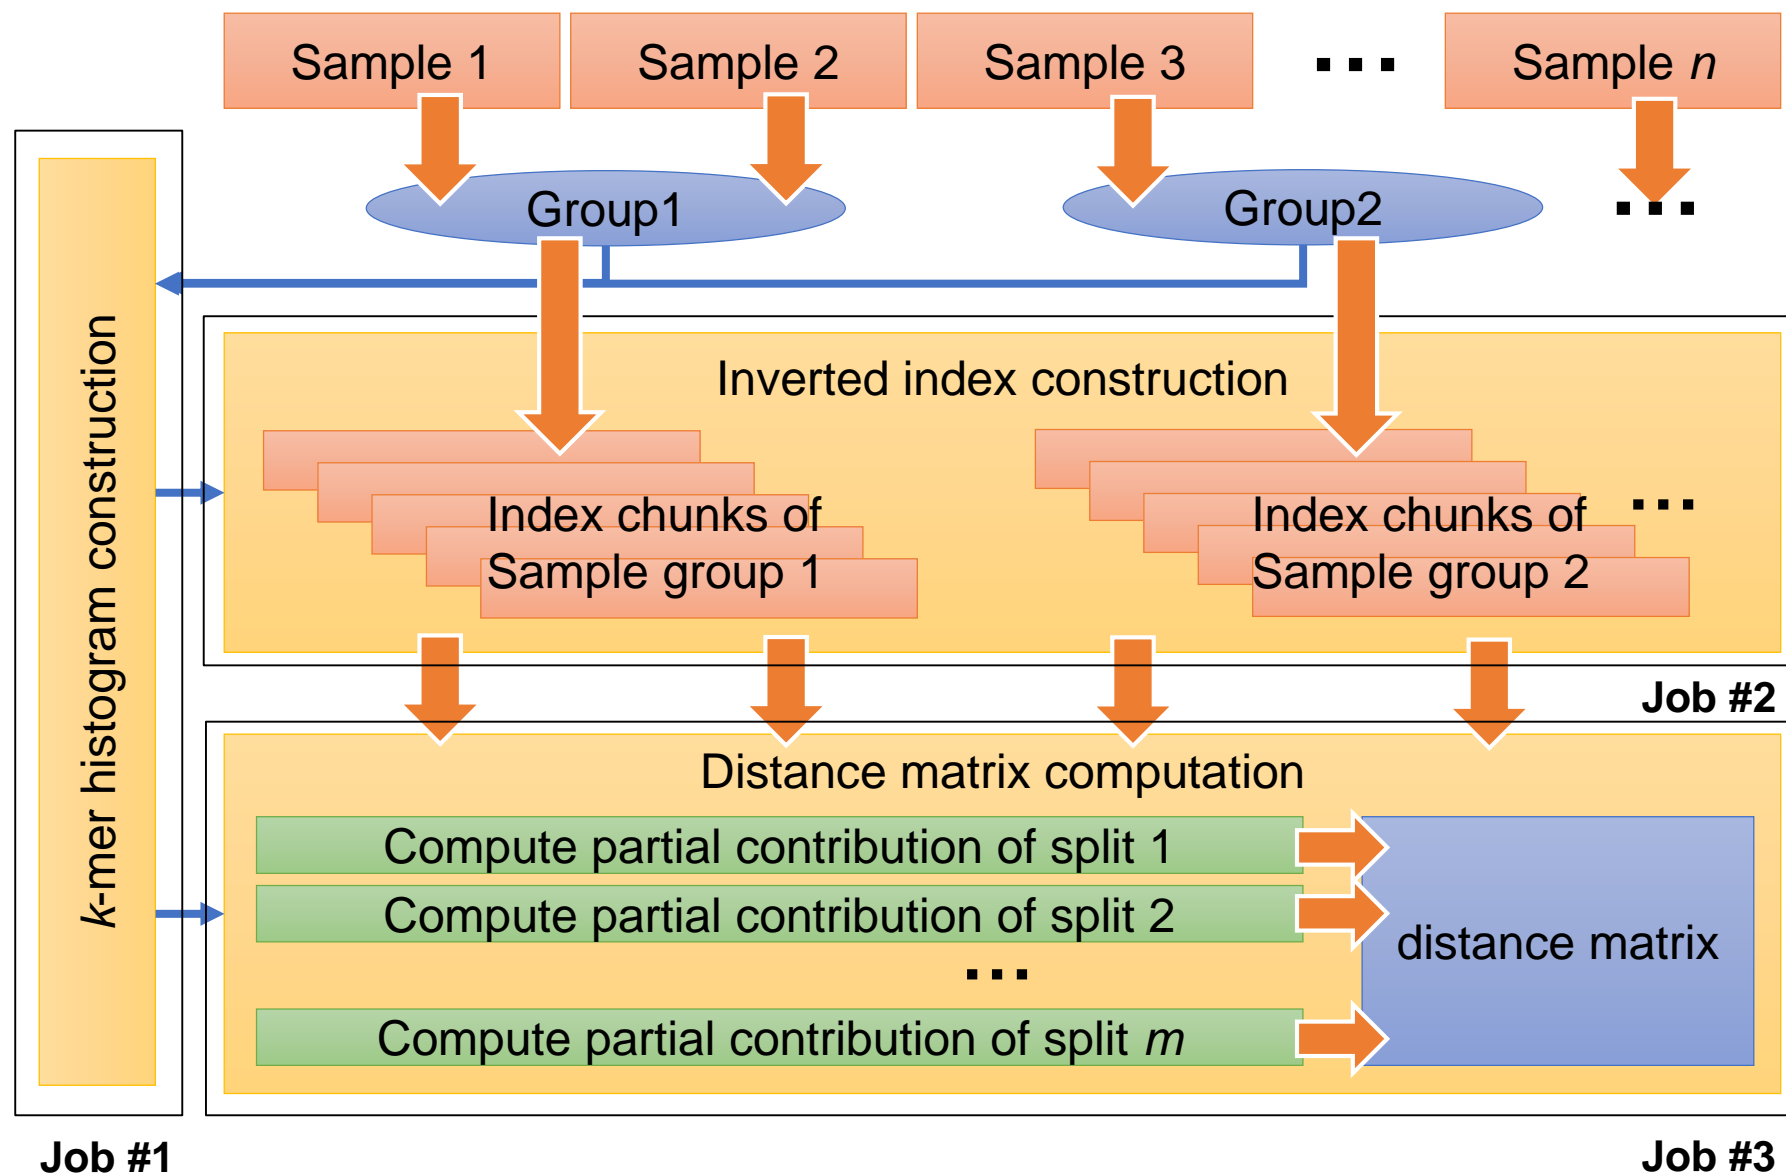

Figure 2

[Click here to download Figure Figure 2.pdf](#)

a

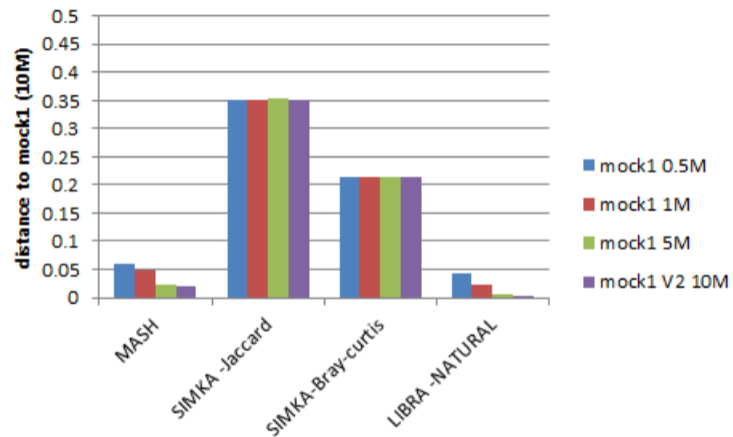

b

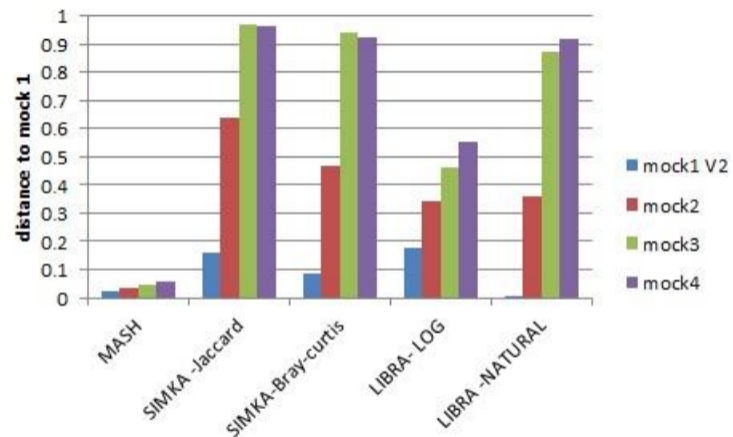



a - MASH

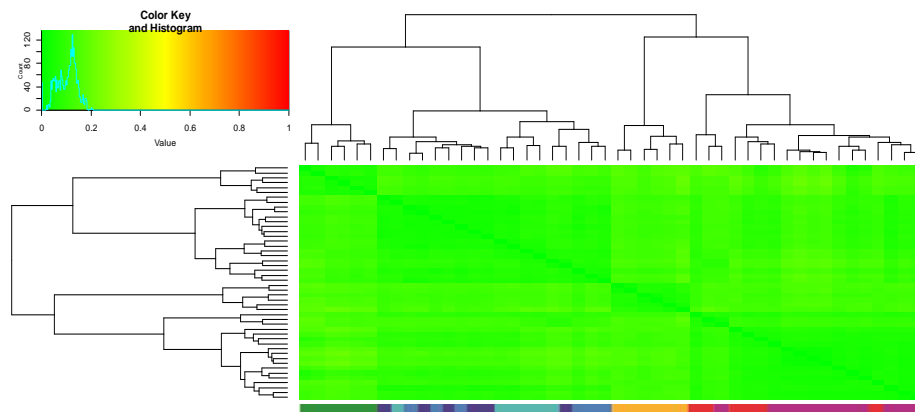

b – LIBRA, log weighting

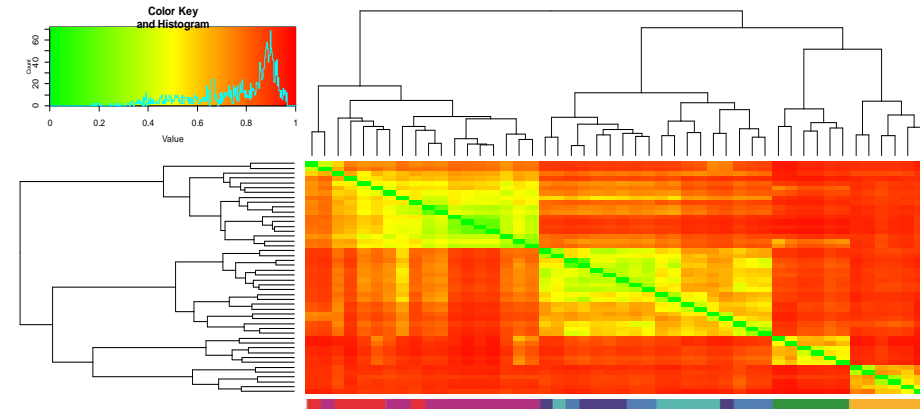

c- SIMKA, abundance Jaccard

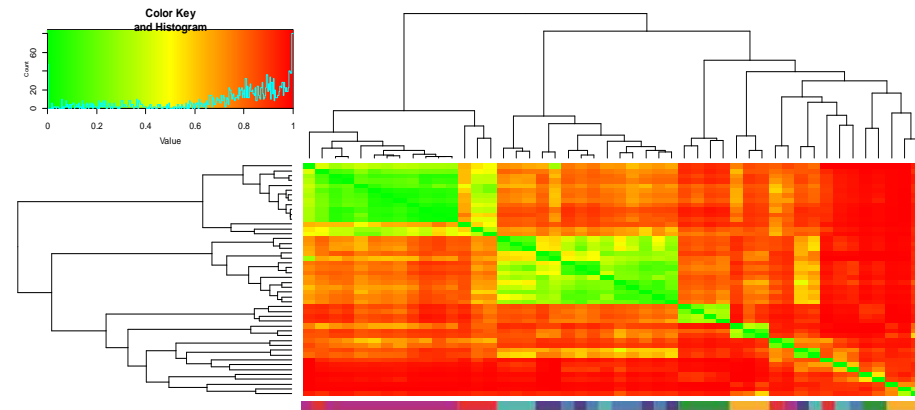

d- SIMKA, abundance Bray-Curtis

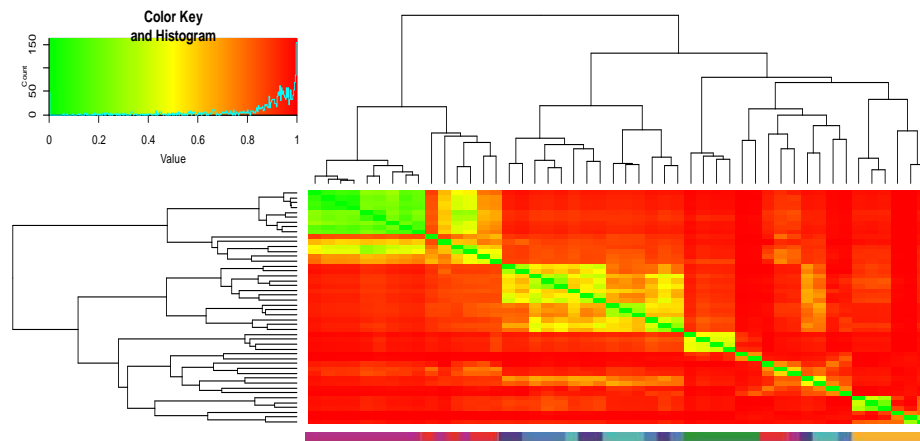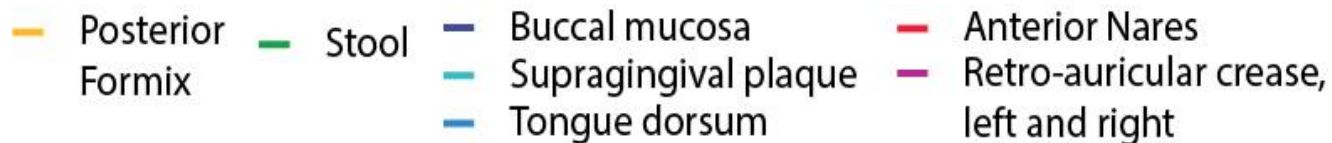

a - MASH

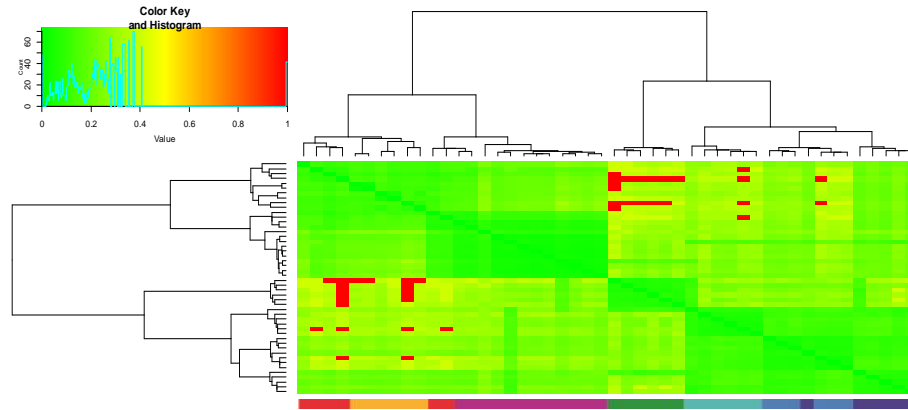

b - LIBRA, log weighting

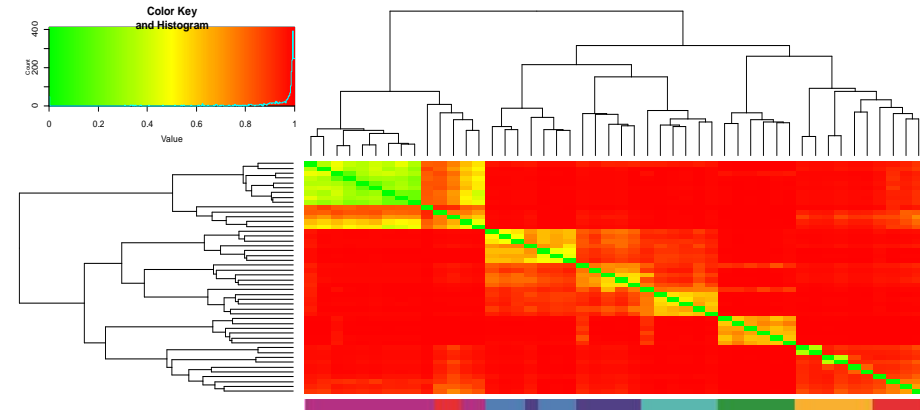

c- SIMKA, abundance Jaccard

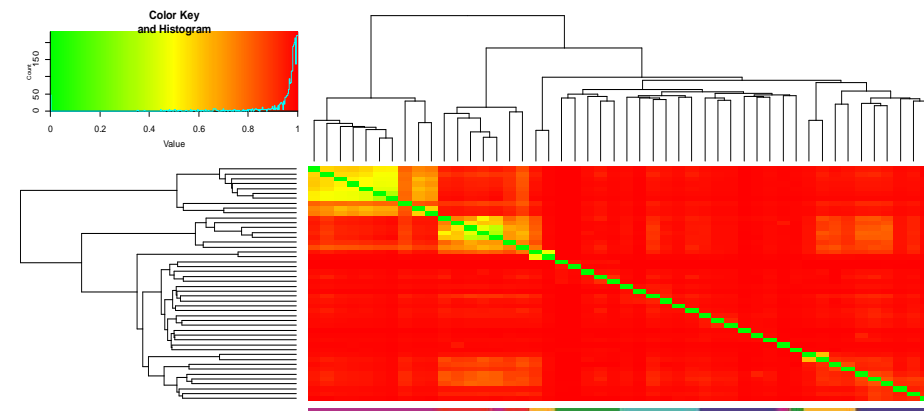

d- SIMKA, abundance Bray-Curtis

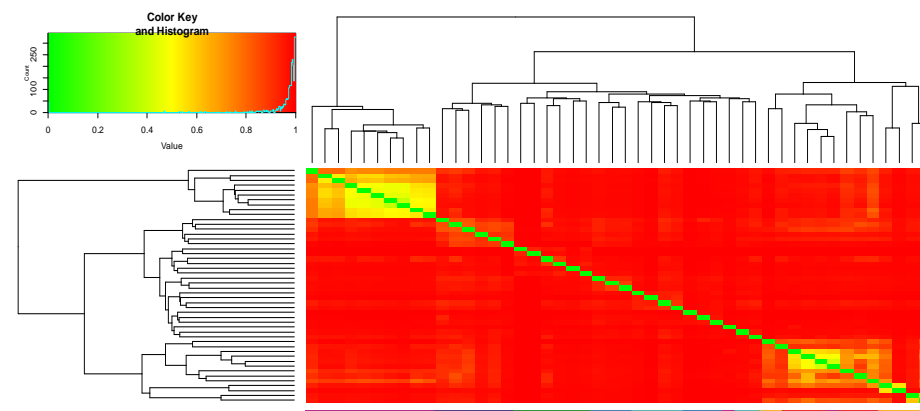

■ Posterior Formix    ■ Stool    ■ Buccal mucosa    ■ Anterior Nares  
■ Supragingival plaque    ■ Retro-auricular crease, left and right  
■ Tongue dorsum

Figure 5

[Click here to download Figure Figure 5.pdf](#)

C0 - 0~14°C  
C1 - 15~21°C  
W0 - 22~25°C  
W1 - 26~30°C

SUR - surface  
DCM - deep chlorophyll maximum  
MES - mesopelagic

|                      |                     |
|----------------------|---------------------|
| Mediterranean Sea    | South Pacific Ocean |
| Red Sea              | North Pacific Ocean |
| Indian Ocean         | Southern Ocean      |
| South Atlantic Ocean |                     |

\*edges < 30% are cut

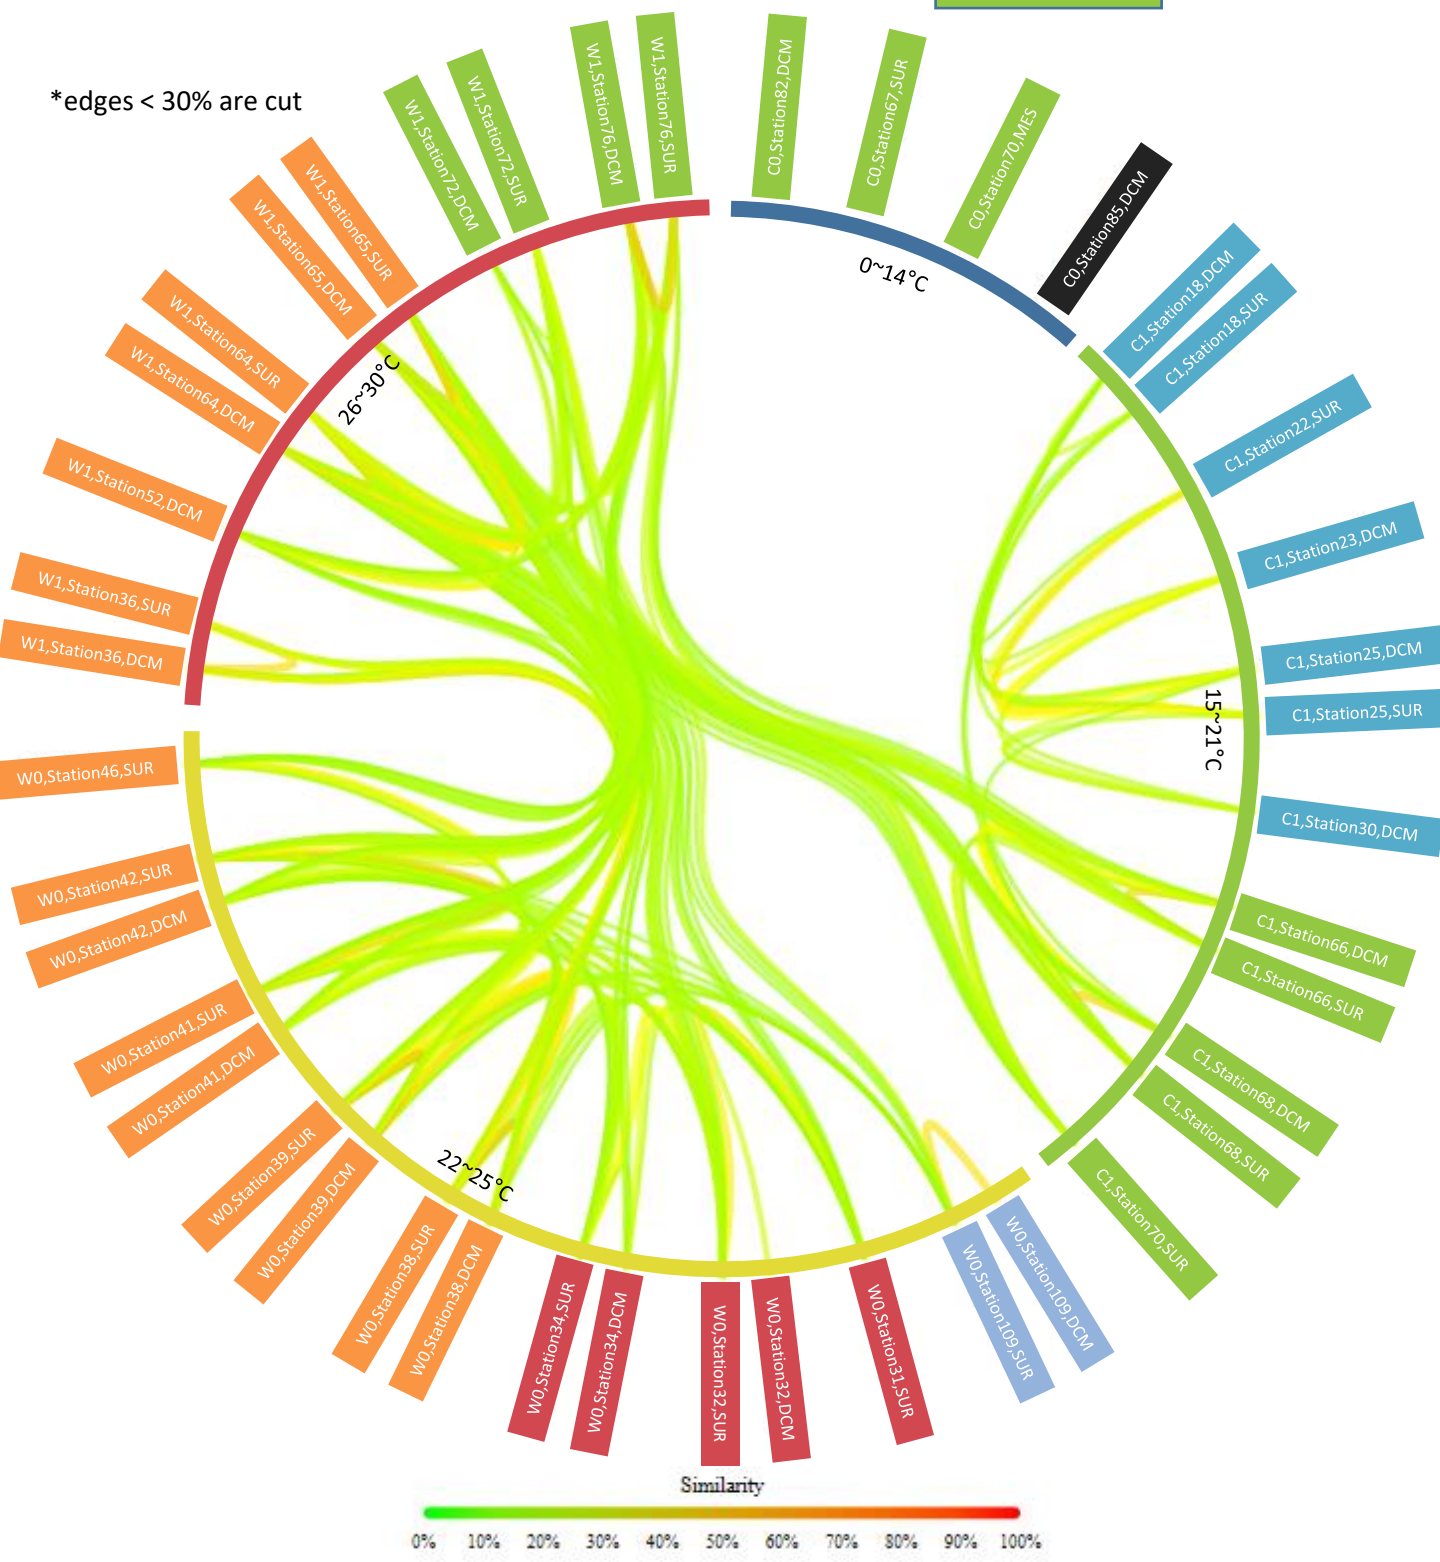

## Runtimes of Libra

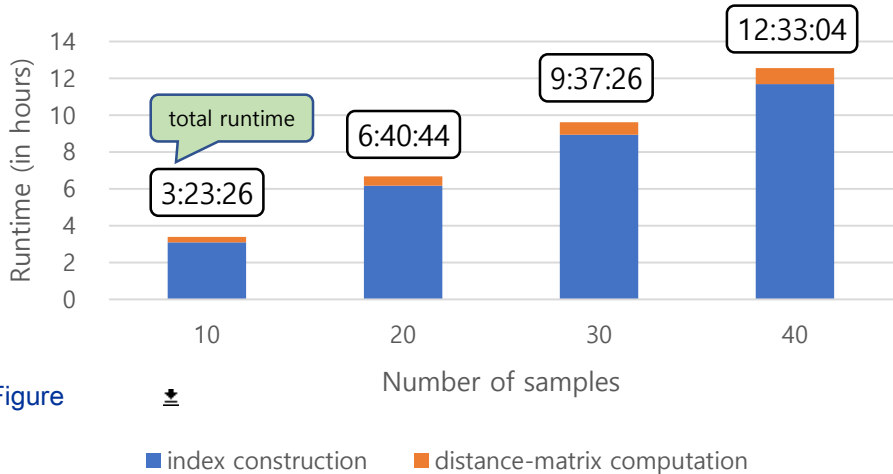

ad Figure

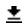

# Runtimes of Libra

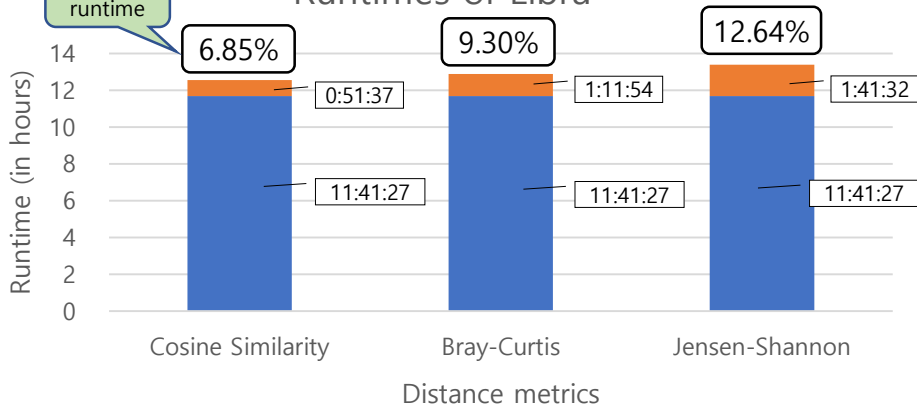

Figure

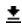

■ index construction

■ distance-matrix computation

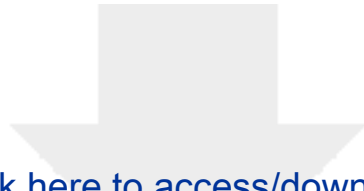

[Click here to access/download](#)

**Supplementary Material**

[Supplemental\\_methods\\_and\\_fig\\_table\\_legends.docx](#)

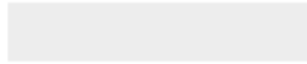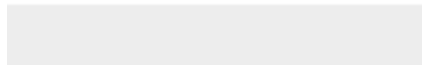

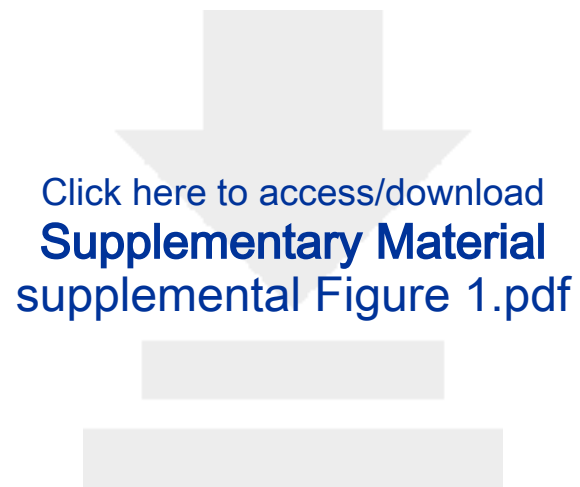

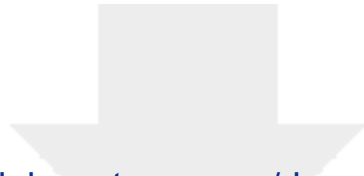

Click here to access/download  
**Supplementary Material**  
Supplemental Figure 2.pdf

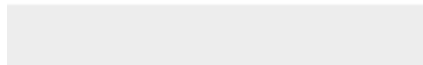





Click here to access/download  
**Supplementary Material**  
Supplemental Figure 3.pdf

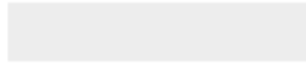



Click here to access/download  
**Supplementary Material**  
Supplemental Table 1.xlsx

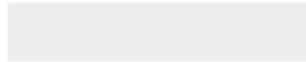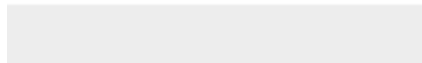



Click here to access/download  
**Supplementary Material**  
Supplemental Table 2.xlsx

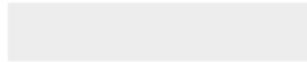



Click here to access/download  
**Supplementary Material**  
Supplemental Table 3.xlsx





Click here to access/download  
**Supplementary Material**  
Supplemental Table 4.xlsx



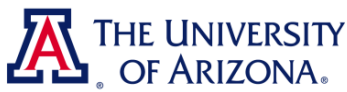

College of Agriculture  
and Life Sciences

August 24, 2018

Dear Editors,

Please find our paper for consideration at *Gigascience* as a research article titled “Libra: robust biological inferences of global datasets using scalable k-mer based all-vs-all metagenomic comparisons”.

Microbiome research spans a broad array of disciplines from medicine, agriculture, bioenergy, and the environment, and is united in addressing core scientific questions relating microbial communities to biological and chemical processes in human, animal, or Earth systems. Given the preponderance of genomic data from diverse environments, there is a new desire to ask cross-cutting questions from the environment to human health. To move this work forward, microbiome datasets need to be holistically analyzed to examine how microbes move through living systems. Currently, only a subset of tools are available that make these analyses possible (through data reduction techniques and read count normalization), but none exploit big data architectures to scale compute and analyze complete datasets (100% of reads) in a linear and fault tolerant manner. This level of resolution is vital in metagenomic analyses where > 50% of the reads are unknown and the only way to understand functional changes in microbial communities is through all-vs-all analysis of diverse datasets to associate sequence patterns with environmental factors. To date, no tool offers a scalable and complete analysis of reads to explore global patterns in microbiome sciences.

Here we describe the first scalable algorithm for comparative metagenomics called Libra that is capable of performing an all-vs-all sequence analysis on hundreds of metagenomes in a Hadoop big data framework. Libra performs with unparalleled accuracy compared to equivalent tools using both simulated and real metagenomic datasets ranging from 80 million to 4.2 billion reads. In contrast to current methods, Libra’s state-of-the-art algorithm and its implementation in a big data architecture does not require a reduction in dataset size or simplified distance metrics to achieve remarkable compute times and accuracy. As a result, Libra enables integration of massive datasets across disciplines to identify microbial and viral signatures linked to key biological processes. Moreover, Libra is available as an open-access web-based tool in iMicrobe (<http://imicrobe.us>) and in Github where the code is available for further optimization and reuse by the community. All authors declare no competing interests and have approved the manuscript for submission. The content of the manuscript has not been published, or submitted for publication elsewhere. Thank you for considering our paper for publication in *Gigascience*.

Sincerely,

A handwritten signature in black ink, appearing to read 'Bonnie Hurwitz', on a light-colored background.

Bonnie Hurwitz, PhD  
Assistant Professor of Biosystems Engineering  
University of Arizona, [bhurwitz@email.arizona.edu](mailto:bhurwitz@email.arizona.edu)
