# Supplementary material for: Libra: scalable k-mer–based tool for massive all-vs-all metagenome comparisons
Source: PubMed Central journal article supplement (PMC6354030; doi:10.1093/gigascience/giy165), 2018-12-28
Supplement: giy165_reviewer_3_report_revision_1.pdf [file giy165_reviewer_3_report_revision_1.pdf]

## Reviewer Report

**Title:** Libra: scalable k-mer based tool for massive all-vs-all metagenome comparisons

**Version:** Revision 1      **Date:** 11/8/2018

**Reviewer name:** Rachid Ounit

### Reviewer Comments to Author:

Authors have partially addressed my concerns, otherwise several still apply:

The reference 4 that authors give for "Microbial dark matter" does not introduce anything about microbial dark matter. Typo ?

Also, note that it was not necessary to move table 1 to supplemental material -- I was hoping for some clarifications about it not more (cf. my previous comment) -- if authors move this table then they will make sure credits/citations are nonetheless fully given.

There is still the issue of the formatting for the equations/formulas/vectors, see "Cosine Similarity metric" or "Sweep line algorithm", some strange symbols are indicated (I opened this manuscript with different PDF readers, including Adobe, they all show formatting issues). Is it an issue by the editor/s platform or authors ?

Finally, "artificial" is still use in Supplemental Figure 1.

### Level of Interest

Please indicate how interesting you found the manuscript: Choose an item.

### Quality of Written English

Please indicate the quality of language in the manuscript: Choose an item.

### Declaration of Competing Interests

Please complete a declaration of competing interests, considering the following questions:

- Have you in the past five years received reimbursements, fees, funding, or salary from an organisation that may in any way gain or lose financially from the publication of this manuscript, either now or in the future?
- Do you hold any stocks or shares in an organisation that may in any way gain or lose financially from the publication of this manuscript, either now or in the future?

- Do you hold or are you currently applying for any patents relating to the content of the manuscript?
- Have you received reimbursements, fees, funding, or salary from an organization that holds or has applied for patents relating to the content of the manuscript?
- Do you have any other financial competing interests?
- Do you have any non-financial competing interests in relation to this paper?

If you can answer no to all of the above, write 'I declare that I have no competing interests' below. If your reply is yes to any, please give details below.

I declare that I have no competing interests.

I agree to the open peer review policy of the journal. I understand that my name will be included on my report to the authors and, if the manuscript is accepted for publication, my named report including any attachments I upload will be posted on the website along with the authors' responses. I agree for my report to be made available under an Open Access Creative Commons CC-BY license (<http://creativecommons.org/licenses/by/4.0/>). I understand that any comments which I do not wish to be included in my named report can be included as confidential comments to the editors, which will not be published.

I agree to the open peer review policy of the journal

To further support our reviewers, we have joined with Publons, where you can gain additional credit to further highlight your hard work (see: <https://publons.com/journal/530/gigascience>). On publication of this paper, your review will be automatically added to Publons, you can then choose whether or not to claim your Publons credit. I understand this statement.

Yes Choose an item.
